1 **Title:**

2 Subcellular metabolic pathway kinetics are revealed by correcting for artifactual post harvest  
3 metabolism

4

5 **Authors:**

6 Sophie Trefely<sup>1,2,3</sup>, Joyce Liu<sup>2,3,4</sup>, Katharina Huber<sup>2,3,5</sup>, Mary T. Doan<sup>1</sup>, Helen Jiang<sup>1</sup>, Jay Singh<sup>1</sup>, Eliana von  
7 Krusenstiern<sup>1</sup>, Anna Bostwick<sup>1</sup>, Peining Xu<sup>1</sup>, Juliane Bogner-Strauss<sup>5</sup>, Kathryn E. Wellen<sup>2,3\*</sup>, Nathaniel W.  
8 Snyder<sup>1\*</sup>

9

10 **Affiliations:**

11 <sup>1</sup> AJ Drexel Autism Institute, Drexel University, Philadelphia, PA 19104 USA

12 <sup>2</sup> Department of Cancer Biology, University of Pennsylvania, Philadelphia, PA 19104 USA

13 <sup>3</sup> Abramson Family Cancer Research Institute, University of Pennsylvania, Philadelphia, PA 19104 USA

14 <sup>4</sup> Biochemistry and Molecular Biophysics Graduate Group, PSOM

15 <sup>5</sup> Institute of Biochemistry, Graz University of Technology, Graz, Austria

16

17 **Corresponding authors address:**

18 Primary:

19 Nathaniel W. Snyder

20 Email: [Nathaniel.W.Snyder@drexel.edu](mailto:Nathaniel.W.Snyder@drexel.edu)

21 Phone: (215) 571-3492

22 Post: A.J. Drexel Autism Institute

23 3020 Market Street, Suite 560

24 Philadelphia, PA 19104-3734

25 USA

26

27 Secondary:

28 Kathryn E. Wellen

29 Email: [wellenk@upenn.edu](mailto:wellenk@upenn.edu)

30 Phone: (215) 746-8599

31 Post: 421 Curie Blvd, 653 BRB II/III

32 Philadelphia, PA 19104-6160

33 USA

34

35 **Key words:**

36 sub-cellular metabolism, stable isotope tracing, acetyl-CoA, organelle, mevalonate pathway,  
37 compartmentalization

38

39 **Abstract**

40 OBJECTIVE:

41 The dynamic regulation of metabolic pathways can be monitored by stable isotope tracing. Yet, many  
42 metabolites are part of distinct processes within different subcellular compartments. Standard isotope  
43 tracing experiments relying on analyses in whole cells may not accurately reflect compartmentalized  
44 metabolic processes. Analysis of compartmentalized metabolism and the dynamic interplay between  
45 compartments can potentially be achieved by stable isotope tracing followed by subcellular  
46 fractionation. Although it is recognized that metabolism can take place during biochemical fractionation  
47 of cells, a clear understanding of how such post-harvest metabolism impacts the interpretation of  
48 subcellular isotope tracing data and methods to correct for this are lacking. We set out to directly assess  
49 artifactual metabolism, enabling us to develop and test strategies to correct for it. We apply these  
50 techniques to examine the compartment-specific metabolic kinetics of <sup>13</sup>C-labeled substrates targeting  
51 central metabolic pathways.

52 METHODS:

53 We designed a stable isotope tracing strategy to interrogate post-harvest metabolic activity during  
54 subcellular fractionation using liquid chromatography-mass spectrometry (LC-MS).

55 RESULTS:

56 We show that post-harvest metabolic activity occurs rapidly (within seconds) upon cell harvest. With  
57 further characterization we reveal that this post-harvest metabolism is enzymatic, and reflects the  
58 metabolic capacity of the sub-cellular compartment analyzed; but is limited in the extent of its  
59 propagation into downstream metabolites in metabolic pathways. We also propose and test a post-  
60 labeling strategy to assess the amount of post-harvest metabolism occurring in an experiment and then  
61 to adjust data to account for this. We validate this approach for both mitochondrial and cytosolic  
62 metabolic analyses.

63 CONCLUSIONS:

64 Our data indicate that isotope tracing coupled with sub-cellular fractionation can reveal distinct and  
65 dynamic metabolic features of cellular compartments, and that confidence in such data can be improved  
66 by applying a post-labeling correction strategy. We examine compartmentalized metabolism of acetate  
67 and glutamine and show that acetyl-CoA is turned over rapidly in the cytosol and acts as a pacemaker of  
68 anabolic metabolism in this compartment.

69 **1. Introduction**

71  
72 Metabolites function as fuel for energy production, as substrates for biosynthetic processes, and also as  
73 important signaling molecules [1,2] but the function of metabolites is highly dependent upon their sub-  
74 cellular location. For example, the central metabolite acetyl-CoA is connected to anabolic functions in  
75 the cytosol and to catabolic processes in the mitochondria. In addition, several other metabolites  
76 associated with the mitochondrial TCA cycle (including succinyl-CoA,  $\alpha$ -ketoglutarate, succinate,  
77 fumarate) also have signaling functions in different compartments [2–5]. Stable isotope tracing by liquid  
78 chromatography-mass spectrometry (LC-MS) is a powerful technique for delineating metabolic  
79 pathways. Monitoring the incorporation of isotope labeled substrates over time can be used to  
80 determine the substrate preferences and kinetic parameters of metabolic pathways under different  
81 conditions [6]. Yet, one limitation of standard isotope tracing experiments is that analyses in whole cells  
82 may not accurately reflect compartmentalized metabolic processes. The application of sophisticated  
83 analysis to data from whole cells have provided valuable information about compartmentalized  
84 metabolic processes [7–10], but these deconvolutions can only be applied to very specific pathways and  
85 rely on annotation of metabolic pathways and assumptions which may not completely reflect the  
86 biological system being studied. Metabolic tracing in isolated organelles represents a classic and

87 important strategy to probe distinct compartments such as mitochondria [11], but such analyses do not  
88 capture the dynamic metabolism between subcellular compartments that occurs in intact cells.

89 Analysis of compartmentalized metabolism can potentially be achieved by stable isotope tracing  
90 followed by subcellular fractionation, but interpretation of the resulting data is complicated due to the  
91 disruption involved in fractionation processing [12]. Thus, reliable direct measurement of kinetic  
92 parameters in sub-cellular metabolite pools is an important but challenging goal. Although it is  
93 recognized that metabolism can take place during biochemical fractionation of cells, a clear  
94 understanding of how such post-harvest metabolism impacts the interpretation of subcellular isotope  
95 tracing data and methods to correct for this are lacking. We set out to directly assess artifactual  
96 metabolism, enabling us to develop and test a post-labeling correction strategy. We apply this method  
97 and validate it in defined model systems. We demonstrate the rapid turnover of acetyl-CoA in the  
98 cytosolic compartment and its co-ordinated use in downstream anabolic pathways. We also observe  
99 distinct regulation of mitochondrial and cytosolic succinyl-CoA production and demonstrate that the use  
100 of a correction strategy is crucial for interpretation of the kinetics of mitochondrial glutamine  
101 metabolism in a labeling and fractionation experiment.

102

## 103 **2. Results**

### 104 **2.1 Dual labeling strategy reveals metabolic activity during fractionation**

105 Generation of artifacts is a concern in any bioanalytical method that includes extensive sample  
106 processing and potentially unstable analytes. This is especially relevant in sub-cellular fractionation,  
107 which is a highly disruptive process that typically requires multiple steps and at least several minutes  
108 before metabolites can be stabilized in an appropriate extraction buffer. We developed a dual labeling  
109 strategy to investigate the potential for metabolism to occur during fractionation processing (**Figure 1A**).  
110 We used Stable Isotope Labeling of Essential nutrients in Cell culture (SILEC) to introduce a heavy  
111 ( $^{13}\text{C}_3^{15}\text{N}_1$ ) label into the CoA backbone of acyl-CoA molecules present in all relevant compartments in  
112 cells. Labeling of >99% of CoA across all measurable acyl-CoA species was achieved through the  
113 passaging of cells in  $^{15}\text{N}_1^{13}\text{C}_3$ -Vitamin B5 (pantothenate) for at least 9 passages as previously described  
114 [13]. In a separate labeling scheme, we performed carbon labeling of the acyl groups of acyl-CoA  
115 molecules by incubation in  $^{15}\text{N}_2^{13}\text{C}_5$ -glutamine for 120 min (**Figure 1A**). Glutamine metabolism results in  
116 incorporation of 4 acyl carbons into succinyl-CoA (succinyl-CoA M4) and 2 acyl carbons of acetyl-CoA  
117 (acetyl-CoA M2). The differently labeled cells (SILEC + acyl-group labeled) were combined after scraping  
118 and subjected to sub-cellular fractionation (**Figure 1A**). Thus, doubly labeled molecules with both heavy  
119 acyl and CoA groups indicate artifactual metabolism as these molecules can only form post-harvest,  
120 after the differently labeled cells have been combined (**Figure 1B, Supp. 1**). This may reflect enzyme  
121 catalyzed metabolism or non-enzymatic acyl interchange between acyl-CoA molecules [14]. Doubly and  
122 singly labeled molecules were detected by liquid chromatography-high resolution mass spectrometry  
123 (LC-HRMS) to differentiate each labeling scheme[15].

124 When applied to two classical differential centrifugation-based fractionation methods  
125 (mitochondria/cytosolic and nuclear (**Supp. 2B**)), the dual labeling strategy revealed extensive artifactual  
126 metabolism during sub-cellular fractionation (red bars). The extent of artifactual post-harvest  
127 metabolism observed varied across different fractionation methods, subcellular fractions, and  
128 metabolites analyzed. Notably, formation of doubly labeled succinyl-CoA from glutamine was generally  
129 more extensive than for acetyl-CoA, proportional to acyl labeling observed in the control with only  
130  $^{15}\text{N}_2^{13}\text{C}_5$ -glutamine labeled cells (**Figure 1C,D**). For both acetyl-CoA and succinyl-CoA, the extent of  
131 artifactual metabolism detected in the nucleus was markedly less than in the mitochondria and cytosol  
132 (**Figure 1C,D**).

133

### 134 **2.2 Substrate use during fractionation follows defined metabolic pathways**

135 Having established that artifactual metabolism occurs during sub-cellular fractionation, we  
136 conducted a series of experiments to further evaluate the artifact's nature and extent. We designed an  
137 experimental approach to trace artifactual metabolism by addition of  $^{13}\text{C}$ -labeled substrates to the  
138 fractionation buffer (**Figure 2A**). The detection of  $^{13}\text{C}$  label in metabolites of interest thus reflected  
139 metabolic activity during processing. The introduction of  $^{13}\text{C}$ -substrates from the very first step of cell  
140 processing (on cold cells before they were scraped) allowed us to monitor the extent of artifactual  
141 metabolism over the entire procedure.

142 The extent of glutamine incorporation into succinyl-CoA in the post-labeling paradigm (**Figure**  
143 **2C**) is much lower than that observed after 120 min pre-labeling of cells (**Figure 1C**) since during pre-  
144 incubation, carbon from glutamine will have time to accumulate in both succinyl-CoA and various other  
145 metabolic products. Therefore, to examine the artifactual activity of the pathway for conversion of  
146 glutamine to succinyl-CoA, we tested post-harvest metabolism of both  $^{15}\text{N}_2^{13}\text{C}_5$ -glutamine and its  
147 metabolic product  $^{13}\text{C}_5$ - $\alpha$ -ketoglutarate (**Figure 2B**). Post-harvest incorporation of  $^{13}\text{C}_5$ - $\alpha$ -ketoglutarate  
148 into succinyl-CoA M4, was substantial in most fractions, while substantial labeling from  $^{13}\text{C}$ -glutamine  
149 was only observed in mitochondria (**Figure 2C**). Importantly, this metabolism occurs rapidly, with  $^{13}\text{C}_5$ - $\alpha$ -  
150 ketoglutarate conversion to succinyl-CoA M4 representing >40% of the succinyl-CoA pool in the whole  
151 cell lysate extracted immediately after cell scraping (WCL i) in both the mito/cyto and the nuclear  
152 isolation procedure. That incorporation of  $^{15}\text{N}_2^{13}\text{C}_5$ -glutamine in the fractionation buffer into succinyl-  
153 CoA was limited compared to  $^{13}\text{C}_5$ - $\alpha$ -ketoglutarate (**Figure 2C**) is not surprising, given that glutamine is  
154 separated from succinyl-CoA by 3 metabolic steps, and  $\alpha$ -ketoglutarate only by 1 step (**Figure 2B**).  $^{13}\text{C}_5$ -  
155  $\alpha$ -ketoglutarate or  $^{15}\text{N}_2^{13}\text{C}_5$ -glutamine labeling of distal metabolites, acetyl-CoA and propionyl-CoA, was  
156 not detected (**Figure 2C**). In support of this interpretation, acetate conversion to acetyl-CoA is a single  
157 step reaction and occurs efficiently with the addition of 0.1 mM  $^{13}\text{C}_2$ -acetate to fractionation buffer,  
158 producing acetyl-CoA M2, which makes up 40% of the cytosolic pool in HepG2 cells (**Figure 2D,E,F**).  $^{13}\text{C}_2$ -  
159 acetate added to the fractionation buffer was also detectable in 3-hydroxymethylglutaryl-CoA (HMG-  
160 CoA), a proximal metabolite in the mevalonate pathway, with predictable 2-carbon inclusion patterns  
161 signifying the co-ordinated addition of acetyl units (**Supp. 2A,C**). Acetate labeling was generally limited  
162 to low levels in downstream metabolites (**Supp. 2C**). Thus, artifactual metabolism during fractionation is  
163 limited in extent to proximal reactions in metabolic pathways.

164 Each sub-cellular fraction exhibits distinctive enrichment of appropriate proteins (**Supp. 2B**). To  
165 investigate the idea that compartmentalization of proteins could drive post-harvest metabolism, we  
166 tested for enzyme dependence of artifactual metabolism. We first used methanol:water (80:20) to  
167 precipitate protein from whole HepG2 cells and separate it from soluble metabolites. De-proteinated  
168 cell extracts were resuspended and incubated in fractionation buffer containing  $^{13}\text{C}_2$ -acetate. Acetyl-CoA  
169 M2 enrichment was not detected after incubation (**Figure 2G, Supp. 2D**) indicating that artifactual  
170 acetate conversion to acetyl-CoA is protein dependent. To specifically establish the enzyme dependence  
171 of artifactual metabolism, we compared 3 different mouse embryonic fibroblast (MEF) cell lines, which  
172 allowed us to titrate the expression levels of acyl-CoA synthetase short-chain family member 2 (ACSS2),  
173 the nuclear-cytosolic enzyme that produces acetyl-CoA from acetate (**Figure 2H**). ACLY loss activates a  
174 glucose-to-acetate metabolic switch, driven by the upregulation of ACSS2 for the production of cytosolic  
175 acetyl-CoA, which is used in downstream anabolic pathways in the cytosol including lipid synthesis.  
176 Acetate accounts for ~80 % of the total acetyl-CoA pool in these cells [16]. The high ACSS2 expression in  
177 the ACLY KO MEF cells corresponded to greater artifactual generation of acetyl-CoA M2 during  
178 fractionation. ACLY KO MEFs displayed 20% enrichment in the non-nuclear fraction (which includes the  
179 cytosol), whilst the modest ACSS2 expression in control MEF cells was accompanied by similarly modest  
180 artifactual acetyl-CoA M2 generation (1.4 %) and acetyl-CoA M2 was barely enriched (0.2 %) in ACSS2 KO  
181 MEFs (**Figure 2H**). Thus, artifactual metabolism is enzymatic and reflects the specific metabolic capacity  
182 of the cell type and compartment isolated.



183 Two principle strategies to avoid artifactual metabolic activity are speed and cold. Since we have  
184 shown that artifactual metabolism occurs to a large extent upon cell scraping, a process that requires  
185 less than 1 minute (**Figure 2C,E,F**) it is unlikely that any fractionation method that uses cultured cells  
186 harvested by scraping can avoid substantial artifactual metabolism regardless of the speed of the  
187 subsequent steps. To address the effect of cold, we performed tracing of  $^{13}\text{C}_2$ -acetate in the  
188 fractionation buffer under extreme cold conditions. Cells were scraped at  $-5\text{ }^\circ\text{C}$  (the sucrose buffers did  
189 not freeze at this temperature). Centrifugation steps were also performed at  $-5\text{ }^\circ\text{C}$  and all transfer steps  
190 were performed in a cold room ( $4\text{ }^\circ\text{C}$ ) with samples in  $-5\text{ }^\circ\text{C}$  isopropanol bath. This extra cold processing,  
191 however, did not prevent artifactual conversion of  $^{13}\text{C}_2$ -acetate to acetyl-CoA M2 in either the mito/cyto  
192 or the nuclear isolation procedures (**Supp. 2E,F**).

193

### 194 **2.3 Rapid quenching of whole cells reveals the dynamic nature of acetyl-CoA metabolism**

195 Given that post-harvest metabolism occurs, we next sought to develop a strategy account and  
196 correct for this. We first targeted acetate and acetyl-CoA metabolism specifically in the cytosol. We  
197 again took advantage of the avid acetate usage in ACLY KO MEF cells. Notably, in these cells, exogenous  
198 acetate feeds cytosolic acetyl-CoA pools as well as fatty acid synthesis, but is not accompanied by  
199 increased mitochondrial acetate usage. Tracing  $0.1\text{ mM }^{13}\text{C}$ -acetate into intermediates of the TCA cycle  
200 revealed negligible incorporation in ACLY KO MEFs [16]. Thus, whole cell acetate tracing in ACLY KO  
201 MEFs largely represents the cytosolic acetate utilization, allowing us to interrogate the dynamics of the  
202 cytosolic acetyl-CoA pool via direct extraction of metabolites from whole cells (i.e., a ‘pseudo-cytosolic’  
203 system). This metabolic wiring (**Figure 3A**) makes these cells uniquely useful for validating results  
204 obtained from sub-cellular tracing by allowing us to compare whole cell ‘pseudo-cytosolic’ data,  
205 obtained immediately upon cell harvest, with cytosolic data obtained through sub-cellular fractionation.

206 We validated a robust technique for harvesting whole cells in stable isotope tracing experiments  
207 within this system by comparing  $^{13}\text{C}_6$ -glucose tracing into acetyl-CoA in ACLY KO MEF cells using 4  
208 different extraction methods head to head. Immediately quenching the metabolism of live cells with  
209 cold solvent produced consistent results - direct extraction into cold ( $4\text{ }^\circ\text{C}$ ) 10% (w/v) trichloroacetic acid  
210 in water (TCA) and direct extraction into cold ( $-80\text{ }^\circ\text{C}$ ) methanol:water (80:20) yielded identical results  
211 (5.4% acetyl-CoA M2) showing low levels of glucose incorporation consistent with previous data [16].  
212 Modifications from direct extraction with additional PBS washing or centrifugation steps, however,  
213 produced disparate results (**Supp. 3A**).

214 Having established a gold standard result for the whole cell labeling by direct extraction into  $4\text{ }^\circ\text{C}$   
215 10% TCA, we applied this to assess ‘pseudo-cytosolic’ acetyl-CoA turnover. ACLY KO MEFs were  
216 incubated in physiological ( $0.1\text{ mM}$ ) acetate concentration and  $^{13}\text{C}$  enrichment of acetyl-CoA and a panel  
217 of short chain acyl-CoA metabolites was monitored over time upon switching to  $^{13}\text{C}_2$ -acetate media.  
218 Acetate was rapidly incorporated into the acetyl-CoA pool, with a steady-state acetyl-CoA M2 level of 69  
219 % achieved in a half-time of less than 5 min (**Figure 3B,H**) The incorporation of carbons from acetate into  
220 acetyl-CoA (acetyl-CoA M2) is rapidly propagated into downstream metabolites including the  
221 mevalonate pathway metabolite HMG-CoA (**Figure 3C,H; Supp. 3I**). These data were recapitulated in a  
222 complementary, reverse labeling approach, monitoring loss of  $^{13}\text{C}$ -label in cells that were pre-labeled  
223 for 16 h with  $^{13}\text{C}_2$ -acetate, before switching to media containing unlabeled acetate (**Supp. 3G,I**).

224

### 225 **2.4 Post-labeling correction resolves mitochondrial and cytosolic acetyl-CoA metabolism**

226 To develop a strategy to account for post-harvest metabolism, we hypothesized that  
227 introduction of an overwhelming supraphysiological concentration of a 1:1 labeled:unlabeled mixture of  
228 the experimentally traced substrate to the fractionation buffer of cells that had been incubated in the  
229 absence of labeled substrate could be used to generate a control for data correction. The overwhelming  
230 concentration is intended to force artifactual metabolism in the same direction by mass action with a

231 1:1 chance of incorporating either no label or the full label (preventing change or saturation of  
232 enrichment) regardless of different metabolic conditions across experimental groups. To study the  
233 metabolism of experimental groups, cells pre-labeled with the substrate were processed in parallel with  
234 the same partially labeled buffer (**Figure 3D**). The substrate used in the fractionation buffer was  
235 identical to the test substrate to reflect the targeted metabolic pathways. An additional control with no  
236 label was used to assess the absolute degree of labeling.

237 <sup>13</sup>C<sub>2</sub>-acetate tracing followed by isolation of the mitochondrial and cytosolic fractions was  
238 performed with and without post-labeling correction and compared to the 'pseudo-cytosolic' data. For  
239 post-labeling an overwhelming concentration of 1:1 labeled:unlabeled acetate (5 mM each) was added  
240 to the fractionation buffer. We are not aware of reliable data on the intracellular concentration of free  
241 acetate, however, the concentration of acetate in human plasma is 50 – 250 μM [17] and although it is  
242 possible that accumulation of acetate within cells may occur, the observation of dynamic acetate  
243 recycling and efflux suggests that this is not likely [18]. Thus the combined post-labeling concentration  
244 of 10 mM is likely ~50-fold the cellular acetate concentration, which is diluted in fractionation buffer  
245 upon cell homogenization. Strikingly, post-label correction (i.e. post-labeled experimental groups  
246 normalized to post-labeled controls) reveals distinct labeling patterns for acetyl-CoA M2 enrichment in  
247 the mitochondria and the cytosol whereas no post-labeling (i.e. no post-label experimental groups  
248 normalized to no post-label controls) does not (**Figure 3F,G**). Lower steady-state acetate labeling in the  
249 mitochondria is consistent with the flexibility of mitochondrial acetyl-CoA pools, which can draw from a  
250 variety of alternative substrates including glucose, whilst cytosolic acetyl-CoA sources are more limited  
251 and acetate dependent in the ACLY KO MEF model (**Figure 3E**). Notably, incorporation of acetate into  
252 the mitochondrial TCA cycle intermediate succinyl-CoA was ~1% (**Supp. 3E,F**), supporting minimal  
253 mitochondrial acetate use in ACLY KO MEF cells. Comparison of post-labeling correction data to the  
254 'pseudo-cytosolic' data for acetyl-CoA showed that acetate kinetics in isolated cytosol and in whole cells  
255 with rapid quenching closely agree (**Figure 3B,G,H Supp. 3I**), consistent with the majority of the acetyl-  
256 CoA pool being localized to the cytosol in these cells. The consistency of these data strongly supports the  
257 use of post-labeling as an effective normalization strategy since artifactual labeling of acetyl-CoA during  
258 post-labeling is as high as 20% (**Supp. 3D**). Mitochondrial HMG-CoA can appear as an intermediate in the  
259 ketogenesis and leucine catabolism pathways, however HMG-CoA was barely, if at all detected in the  
260 mitochondrial fraction, indicating that in ACLY KO MEFs under these conditions the dominant HMG-CoA  
261 pool is present in the cytosol where it contributes to the mevalonate pathway. Accordingly,  
262 incorporation of acetate into cytosolic HMG-CoA is consistent with 'pseudo-cytosolic' direct extraction  
263 (**Figure 3C,H,I; Supp. 3I**). The half-time and steady-state level of acetate incorporation into cytosolic  
264 acetyl-CoA and downstream into cytosolic HMG-CoA are consistent in both 'pseudo-cytosolic' and  
265 cytosolic fractionation experiments with post-label correction (**Figure 3H**). The synchronization of label  
266 incorporation in these pathways demonstrates the rapid transfer of cytosolic acetyl-CoA into  
267 downstream anabolic pathways.

268

## 269 **2.5 Kinetics of mitochondrial glutamine metabolism are transformed by post-label correction**

270 To further test the generalizability of our post-labeling approach we applied it to examine the  
271 kinetics of succinyl-CoA metabolism by incubation of HepG2 cells in <sup>15</sup>N<sub>2</sub>,<sup>13</sup>C<sub>5</sub>-glutamine over a time-  
272 course before analysis of isotopologue enrichment into short chain acyl-CoAs in the mitochondria and  
273 cytosol. The kinetics of succinyl-CoA M4 labeling were strikingly different between compartments  
274 (**Figure 4A**). Mitochondrial glutamine incorporation appeared to be very rapid (half-time of 4.1 min)  
275 compared to the cytosol (half-time of 14.4 min), though the percent molar enrichment of succinyl-CoA  
276 M4 in both pools converge at a steady state to 76 % labeling after 80 min <sup>15</sup>N<sub>2</sub>,<sup>13</sup>C<sub>5</sub>-glutamine incubation.  
277 The clear separation at early timepoints of succinyl-CoA labeling between mitochondrial and cytosolic  
278 pools indicates that the mitochondria remain intact and mostly impermeable to succinyl-CoA exchange

279 during fractionation, since the 2 compartments are only physically separated at the final step of  
280 processing. Acetyl-CoA and propionyl-CoA also exhibited distinct kinetics of labeling in mitochondria as  
281 compared to cytosol (**Supp 4A,B**). The much faster labeling of mitochondrial than whole cell succinyl-  
282 CoA is inconsistent with the presumption that much of cellular succinyl-CoA is contained within  
283 mitochondria. We therefore questioned how much of this mito/cyto labeling was due to metabolism  
284 that took place during the intended  $^{15}\text{N}_2,^{13}\text{C}_5$ -glutamine incubation period versus artifactual post-harvest  
285 metabolism during the fractionation process. Since post-harvest conversion of  $^{15}\text{N}_2,^{13}\text{C}_5$ -glutamine into  
286 succinyl-CoA M4 occurred to a greater extent in the mitochondria than the cytosol and WCL (**Figure 2C**)  
287 this could conceivably lead to apparent (but artifactual) kinetic differences observed between these  
288 compartments in cells pre-incubated in  $^{15}\text{N}_2,^{13}\text{C}_5$ -glutamine (**Figure 4A**).

289 We investigated the impact of post-harvest metabolism on succinyl-CoA labeling kinetics using  
290 our post-labeling approach. HepG2 cells were preincubated in  $^{15}\text{N}_2,^{13}\text{C}_5$ -glutamine over a time-course  
291 followed by processing with 1:1  $^{15}\text{N}_2,^{13}\text{C}_5$ -glutamine:glutamine (both at 5 mM). Intracellular glutamine  
292 concentrations between 4  $\mu\text{M}$  and 1.4 mM have been reported [19]. Thus the combined post-labeling  
293 concentration of 10 mM is likely >10-fold the cellular glutamine concentration, and cell contents are  
294 significantly diluted upon addition of fractionation buffer. Post-label normalization led to a substantial  
295 transformation of the mitochondrial succinyl-CoA labeling, whilst having little impact on the cytosolic  
296 and WCL data (**Figure 4B**). Several factors indicate the validity of the post-label corrected data. First, the  
297 WCL now agrees with the average of cytosol and mitochondria, consistent with at least a substantial  
298 proportion of the actively metabolized succinyl-CoA pool being localized to the mitochondria. Second,  
299 when the data are normalized to post-label controls the WCL (i) and WCL (ii) curves overlap (**Figure 4C**).  
300 Normalization of the post-labeled data for WCL to no post-label controls reveals the absolute level of  
301 labeling is lower in the WCL(i) aliquot collected earlier in processing compared to WCL(ii), collected after  
302 cell homogenization (**Figure 4D**). Since WCL(i) is the same fraction as WCL(ii) except with less artifactual  
303 metabolism, the data should converge, as observed, if artifactual metabolism is corrected for. Third,  
304 analysis of  $^{15}\text{N}_2,^{13}\text{C}_5$ -glutamine incorporation into other TCA cycle intermediates directly extracted from  
305 whole cells show half-times consistent with the post-labeled corrected data and inconsistent with  
306 uncorrected data (**Figure 4E, Supp 4F-J**). Thus, we conclude that inclusion of the post-label correction  
307 prevents erroneous conclusions and reveals the true kinetics of mitochondrial glutamine metabolism.  
308

### 309 3. Discussion

310 In sum, the data clearly demonstrate that metabolism occurs post-harvest, that it cannot be  
311 sufficiently prevented by rapid speed of fractionation or by very cold temperatures, and that this  
312 impacts the interpretation of data from experiments involving isotope tracing followed by subcellular  
313 fractionation. Kinetic data in mitochondrial fractions appear to be particularly compromised by post-  
314 harvest artifactual metabolism, at least during glutamine tracing. We further show that a post-label  
315 correction can be applied to improve confidence in data from such experiments. As interest in the role  
316 of metabolites as signaling molecules and the importance of compartmentalization in their function  
317 gains pace, sub-cellular metabolomic analyses are emerging as a critical tool [19–22]. Though we have  
318 used classical fractionation approaches in this study, the post-label correction strategy can be applied to  
319 any fractionation approach in which the investigator employs metabolic labeling followed by  
320 fractionation. Our strategy presents a useful approach to help validate previous and emerging sub-  
321 cellular tracing studies in which compartments are isolated after experimental perturbation [23]. This is  
322 a powerful approach as it provides insight into the dynamic metabolic interplay between organelles.

323 Several important caveats limit the applicability of post-labeling as a universal correction factor.  
324 We demonstrate that multiple proximal metabolic intermediates contribute to artifactually generated  
325 pools of metabolites (**Figure 2**), thus the validity of just one tracer as a correction factor is not  
326 comprehensive. Practical limitations make the addition of tracers accounting for all metabolic steps

327 between a tracer and the measured metabolite unfeasible, especially in cases where the exact  
328 metabolic pathway generating a metabolite in a specific compartment may not be known. Moreover,  
329 access to the correction tracer in discrete membrane bound compartments such as the mitochondria  
330 may be limited by the availability and activity of transporters. The post-labeling approach also by  
331 definition can only be applied to tracing experiments. While post-harvest metabolism may also impact  
332 interpretation of subcellular metabolite quantification, different strategies will be required to address  
333 non-isotope tracing experiments.

334 Despite these caveats and limitations, our approach represents an important step towards  
335 resolving metabolic fluxes in subcellular compartments. We directly demonstrate the validity of post-  
336 labeling correction for the analysis of glutamine and acetate metabolism in the mitochondria and  
337 cytosol and reveal kinetic data with direct physiological relevance. We show rapid acetyl-CoA turnover  
338 specifically in the cytosol and its co-ordinated transferral downstream into the mevalonate pathway,  
339 implicating cytosolic acetyl-CoA as a dynamic pacemaker for anabolism. We also reveal distinct  
340 regulation of mitochondrial from cytosolic succinyl-CoA - a metabolite pool whose existence is indicated  
341 by succinylation of cytosolic proteins [24,25], yet whose metabolic origin and regulation is not defined.  
342 We anticipate that this post-labeling strategy can be applied to address numerous biological questions  
343 about compartmentalized metabolic regulation.

344  
345

## 346 4. Experimental Procedures

347

### 348 4.1 Cell culture:

349 Cells were passaged every 2-3 days at 80% confluence. Mouse embryonic fibroblast (MEF) cell lines were  
350 generated in the Wellen lab[16] (available upon request) and were cultured in DMEM, high glucose  
351 (Thermo Fisher Scientific, Gibco #11965084) with 10% calf serum (Gemini bio-products #100-510, lot  
352 C93GOOH). Hepatocellular carcinoma (HepG2) cells were used at <20 passages from ATCC stocks (ATCC  
353 cat. #HB-8065) and were cultured in DMEM, high glucose with 10% fetal bovine serum (Gemini  
354 Biosciences) and penicillin/streptomycin (Thermo Fisher Scientific, Gibco cat. #10378016). All cells were  
355 tested and mycoplasma-free.

356

### 357 4.2 Stable isotope pre-labeling:

358 For glutamine tracing, normal growth media was aspirated and replaced with unlabeled DMEM (5 mM  
359 Glc, 2 mM Gln, no serum) and cells were preincubated for 1 h. The pre-incubation media was replaced  
360 with <sup>13</sup>C-Gln media (DMEM without glutamine, glucose or phenol red (Thermo-Fisher scientific, Gibco  
361 cat. #A1443001) supplemented with 5 mM glucose and 2 mM <sup>5</sup>N<sub>2</sub><sup>13</sup>C<sub>5</sub>-glutamine added in a backwards  
362 time-course, starting with 2 h, so that all dishes finish at the same time.

363 For acetate tracing, normal growth media was aspirated and replaced with unlabeled DMEM +  
364 0.1 mM acetate (high glucose DMEM + 10% dialyzed FBS and 0.1 mM unlabeled acetate) and cells were  
365 preincubated for 1 h. The pre-incubation media was replaced with <sup>13</sup>C-acetate media (high glucose  
366 DMEM + 10% dialyzed FBS and 0.1 mM <sup>13</sup>C<sub>2</sub>-acetate added in a backwards time-course, so that all dishes  
367 finish at the same time.

368 SILEC labeling of HepG2 cells was achieved as previously described [26]- HepG2 cells were passaged in  
369 custom DMEM (high glucose (25 mM), glutamine (2 mM)) without pantothenate (Athena Biosciences  
370 cat. #0500-198) with the addition of <sup>15</sup>N<sub>1</sub><sup>13</sup>C<sub>3</sub>-vitamin B5 (pantothenate) (Isosciences) and  
371 charcoal:dextran stripped fetal bovine serum (Gemini Biosciences cat. #100-199, lot #A67FO2H) to 10%.  
372 Labeling efficiency was tested by isotopologue enrichment analysis with comparison to unlabeled  
373 controls cells.

374 For glucose labeling of ACLY KO MEF cells, normal growth media was aspirated and replaced  
375 with unlabeled DMEM (hi glucose DMEM + 10% dialyzed FBS + 1 mM acetate) and cells were  
376 preincubated for 16 h. The pre-incubation media was replaced with <sup>13</sup>C<sub>6</sub>-glucose media (DMEM without  
377 glucose or glutamine (Gibco) supplemented with 2 mM glutamine and 5 mM <sup>13</sup>C<sub>6</sub>-glucose + 10% dialyzed  
378 FBS, no acetate) for 4 h. Control unlabeled cells received the same media except with unlabeled glucose  
379 instead of <sup>13</sup>C<sub>6</sub>-glucose.

380

### 381 4.3 Mitochondria and cytosol isolation:

382 Media was poured from dishes into a waste container and cells were placed on ice at a 45° angle and  
383 residual media drained and aspirated completely. Dishes were laid flat on ice and 1 ml ice-cold buffer  
384 (210 mM mannitol, 70 mM sucrose, 5 mM Tris-HCl (pH 7.5), 1 mM EDTA (pH 8), adjusted to pH 7.5)  
385 added to each dish. Cells were scraped into the buffer and transferred to a pre-chilled 1 ml Potter-  
386 Elvehjem Tissue Grinder (Corning cat. #7725T-1) in a beaker of ice and water. For WCL i analysis, 100 µl  
387 was removed after scraping and quenched in 1 ml ice-cold 10% trichloroacetic acid (TCA) (Sigma cat.  
388 #T6399) in deionized water. Cells were lysed by stroking with the pestle operated at 1,600 rpm (15  
389 strokes for HepG2 cells, 30 strokes for MEF cells). Homogenate was transferred to 1.5 ml tubes on ice.  
390 For WCL ii analysis, a 100 µl aliquot of homogenate was removed and quenched in 1 ml ice-cold 10%  
391 TCA in water. Homogenate was centrifuged at 1,300 x g from 10 min at 4 °C and supernatant was  
392 transferred to a new pre-chilled 1.5 ml tube. The 'heavy debris' pellet was quenched by resuspension in  
393 1 ml 10% TCA and the supernatant was centrifuged at 10,000 x g for 20 min at 4 °C to pellet

394 mitochondria. The supernatant (the cytosolic fraction) was quenched by transferal to a new 1.5 ml tube  
395 containing 0.25 ml of 50% (w/v) TCA in water to make a final concentration of 10% TCA. Residual  
396 cytosolic fraction was removed from the mitochondrial pellet with P200 pipette, and the pellet was  
397 quenched by resuspension in 1 ml 10% w/v TCA in water. Samples were stored at -80 before thawing for  
398 processing or directly processed.

399

#### 400 **4.4 Nuclear isolation:**

401 Media was poured from dishes into a waste container and cells were placed on ice at a 45° angle and  
402 residual media drained and aspirated completely. Dishes were laid flat on ice and 0.5 ml ice-cold lysis  
403 buffer (250 mM sucrose, 15 mM Tris-HCl (pH 7.5), 60 mM KCl, 15 mM NaCl, 5 mM MgCl<sub>2</sub>, 1 mM CaCl<sub>2</sub>  
404 and NP-40 0.1%, adjusted to pH 7.4) added to each dish. Cells were scraped into the buffer. For WCL i  
405 analysis, 50 µl was removed after scraping and quenched in 1 ml ice-cold 10% TCA in water. Cell  
406 suspension was homogenized by pipetting up and down on the dish with a P1000 4 times and  
407 transferred to a pre-chilled 1.5 ml tube on ice. For WCL ii analysis, 50 µl was removed after  
408 homogenization and quenched in 1 ml ice-cold 10% TCA in water. Nuclei were pelleted by centrifugation  
409 at 600 x g for 5 min at 4 °C. The supernatant (the 'non-nuclear' fraction) was quenched by transferal to a  
410 new 1.5 ml tube containing 0.125 ml of 50% (w/v) TCA in water to make a final concentration of 10%  
411 TCA. The nuclear pellet was washed by the addition of 0.5 ml lysis buffer without NP-40 and  
412 recentrifuged at 600 x g for 5 min at 4 °C. For experiments in which tracer was added to the  
413 fractionation buffer, tracer was not added to the wash buffer. The supernatant (the 'wash' fraction) was  
414 quenched by transferal to a new 1.5 ml tube containing 0.125 ml of 50% (w/v) TCA in water to make a  
415 final concentration of 10% TCA. Residual wash was removed from the nuclear pellet, which was  
416 quenched by the resuspension in 1 ml 10% w/v TCA in water. Samples were stored at -80 before thawing  
417 on ice for processing or directly processed.

418

#### 419 **4.5 Whole cell extraction:**

420 For direct 10% TCA extraction: Media was poured from dishes into a waste container and cells were  
421 placed on ice at a 45° angle and residual media aspirated completely. Dishes were laid flat on ice and 1  
422 ml 10% TCA in water added, cells were scraped into the TCA and transferred to 1.5 ml tubes kept on ice.

423 For 80:20 methanol:water extraction: Media was poured from dishes into a waste container and  
424 cells were placed on ice at a 45° angle and residual media aspirated completely. Aspirated dishes were  
425 laid flat on dry ice and 1 ml of -80 C 80:20 HPLC grade (Optima) methanol:water added, in which cells  
426 were scraped and transferred to 1.5 ml tubes kept on ice.

427 For PBS extraction: Cells were placed at a 45° angle on ice and medium was aspirated, cells were  
428 washed with 4 ml ice-cold PBS and aspirated completely. Before being scraped into 0.5 ml of ice-cold  
429 deionized water and transferred to a 1.5 ml Eppendorf tube containing 0.5 ml 4 °C 20% TCA in water.

430 For DMEM extraction: cells were placed flat on ice and scraped directly into the pre-incubation  
431 medium, transferred to 15 ml tubes (kept on ice) and spun down at 900 x g at 4 °C for 5 min. Media was  
432 removed by aspiration and the cell pellet resuspended in 1 ml 4 °C 10% TCA in water.

433

#### 434 **4.6 Acyl-CoA sample processing:**

435 Cell and fraction samples in 10% (w/v) trichloroacetic acid (Sigma cat. #T6399) in water were sonicated  
436 for 12 x 0.5 sec pulses, protein was pelleted by centrifugation at 17,000 x g from 10 min at 4 °C. The  
437 supernatant was purified by solid-phase extraction using Oasis HLB 1cc (30 mg) SPE columns (Waters).  
438 Columns were washed with 1 mL methanol, equilibrated with 1 mL water, loaded with supernatant,  
439 desalted with 1 mL water, and eluted with 1 mL methanol containing 25 mM ammonium acetate. The  
440 purified extracts were evaporated to dryness under nitrogen then resuspended in 55 µl 5% (w/v) 5-  
441 sulfosalicylic acid in water.

442

#### 443 **4.7 Acyl-CoA isotopologue analysis:**

444 Acyl-CoAs were measured by liquid chromatography- high resolution mass spectrometry. Briefly, 5-10  $\mu$ l  
445 of purified samples in 5% SSA were analyzed by injection of an Ultimate 3000 HPLC coupled to a Q  
446 Exactive Plus (Thermo Scientific) mass spectrometer in positive ESI mode using the settings described  
447 previously[15]. This method was modified for the dual-labeling experiment by expansion of the isolation  
448 window to capture all possible isotopologues of succinyl-CoA and acetyl-CoA. Quantification of acyl-  
449 CoAs was via their MS2 fragments and the targeted masses used for isotopologue analysis are indicated  
450 in **Supp. Table 1**. Data were integrated using Tracefinder (Thermo Scientific) software and isotopic  
451 enrichment was calculated by normalization to unlabeled control samples using the FluxFix  
452 calculator[27].

453

#### 454 **4.8 TCA intermediate sample processing:**

455 HepG2 cells were grown in 10 cm dishes and pre-labeled as described above. At harvest, dishes were  
456 placed on ice, medium was aspirated thoroughly, and cells were immediately scraped into 1 ml/dish  
457 80:20 Methanol:water (HPLC-grade, Optima) pre-chilled to -80 °C. Samples were transferred to 1.5 ml  
458 tubes and pulse-sonicated for 12 0.5 sec pulses with a probe tip sonicator and centrifuged at 17,000 rcf  
459 at 4 °C for 10 min. The supernatant was transferred to glass tubes and dried under nitrogen. Samples  
460 were resuspended in 100  $\mu$ l of 5% w/v sulfosalicylic acid in water.

461

#### 462 **4.9 TCA intermediate isotopologue analysis:**

463 Isotopologue enrichment analysis of polar metabolites was performed using the ion-pairing reversed-  
464 phase ultra-high performance liquid chromatography method modified from Guo *et al*[28]. 5  $\mu$ l was  
465 injected for analysis on Q Exactive HF instrument with SIM settings based on the unlabeled mass of each  
466 targeted metabolite with mass windows and offset accommodating all potential isotopologues. Masses  
467 used for isotopologue analysis are indicated in **Supp. Table 2**. Data from the MS1 peaks were integrated  
468 using XCalibur Quan browser (Thermo v2.3) software and isotopic enrichment was calculated by  
469 normalization to unlabeled control samples using the FluxFix calculator[27].

470

#### 471 **4.10 Stable isotope labeled substrates:**

472  $^{15}\text{N}_2$  $^{13}\text{C}_5$ -glutamine (Cambridge Isotope Laboratories CNLM-1275-H-PK),  $^{13}\text{C}_5$ - $\alpha$ -ketoglutarate (Cambridge  
473 Isotope Laboratories CNLM-2411-PK),  $^{13}\text{C}_2$ -acetate (Cambridge Isotope Laboratories CNLM-440-5),  $^{13}\text{C}_6$ -  
474 glucose (Cambridge Isotope Laboratories CLM-1396-1), Vitamin B5- [ $^{13}\text{C}_6$  $^{15}\text{N}_2$ ] (calcium pantothenate-  
475 [ $^{13}\text{C}_6$  $^{15}\text{N}_2$ ]) (Isosciences catalogue #5065).

476

#### 477 **4.11 Western blotting:**

478 Western blotting was performed using mini gel tank system (Life Biotechnologies) with 4-12% gradient  
479 Bis-Tris gels (NuPage, Invitrogen cat. #NP0335) and 0.45  $\mu$ m pore size nitrocellulose membranes (BioRad  
480 cat. #1620115) with antibody incubations according to the manufacturers instructions. An Odyssey CLx  
481 imaging system with Image Studio v2.0.38 software (LI-COR Biosciences) was used to acquire images  
482 which were exported as TIFF files and cropped and arranged using Adobe Illustrator software v23.0.1  
483 The following antibodies were used in this study;  $\alpha$ -tubulin (Sigma, cat. #T16199), ACS2 (Cell Signaling  
484 Technology, cat. #3658, clone: D19C6, lot: 2), ACLY (Proteintech, cat. #15421-1-AP, lot: 00040639),  
485 histone H3 (Abcam cat. #ab1791), histone H4 (Millipore cat. #05-858), FASN (Cell Signaling Technology,  
486 cat. #3189, lot: 2), citrate synthase (Cell Signaling Technology, cat. #14309, clone: D7V8B, lot: 1),  
487 LaminA/C (Cell Signaling Technology, cat. #2032), DNMT1 (Active Motif cat. # 39905 Lot# 12914002),  
488 LAMP1 (Cell Signaling Technology, cat. #3243 clone C54H11, lot 4), catalase (Cell Signaling Technologies,  
489 cat. #14097, clone D5N7V, lot 1).

490

491 **4.12 Statistical analyses:**

492 Data presented are shown either of mean  $\pm$  standard deviation or, for curve fits, mean  $\pm$  95% confidence  
493 intervals. Graphpad Prism software (v.8) was used for graphing and statistical analysis. One-phase  
494 association function was used to fit non-linear curves and calculate kinetic parameters including half-  
495 times. For comparison between two groups, datasets were analyzed by two-tailed Student's t-test with  
496 Welch's correction and statistical significance defined as  $p < 0.05$  (\*),  $p < 0.01$  (\*\*),  $p < 0.001$  (\*\*\*),  $p <$   
497  $0.0001$  (\*\*\*\*).

498



499 **Acknowledgements:**

500 This work was funded by NIGMS grant R01GM132261 and NICHD grant R03HD092630 to NWS and NCI  
501 grant R01CA174761 to KEW. ST was funded by American Diabetes Association post-doctoral fellowship  
502 #1-18-PDF-144. KH and JB-S were supported by the Austrian Science Fund grants FWF W1226 and FWF  
503 P27108.

504  
505 **Author contributions:**

506 ST, NWS and KEW conceptualized the study and designed experiments. ST prepared figures and wrote  
507 the manuscript. NWS and KEW edited the manuscript. ST performed the majority of the experiments  
508 and data analysis. JL and KH performed experiments and analysis. MD, HJ, JS, EVK, AB and PX performed  
509 metabolite extraction and analysis. JB-S supported KH and provided useful discussion. All authors read  
510 and provided feedback on manuscript and figures.

511  
512 **Competing interests statement:**

513 None of the authors have competing interests to declare related to this work.

514  
515 **Data availability:**

516 All data relevant to this study are presented in the figures.

517  
518 **Code availability:**

519 This study does not use any custom code that has not been published or licensed elsewhere.

520  
521 **References:**

- 522
- 523 [1] Kinnaird, A., Zhao, S., Wellen, K.E., Michelakis, E.D., 2016. Metabolic control of epigenetics in  
524 cancer. *Nature Reviews Cancer* 16(11): 694–707, Doi: 10.1038/nrc.2016.82.
  - 525 [2] Ryan, D.G., Murphy, M.P., Frezza, C., Prag, H.A., Chouchani, E.T., O'Neill, L.A., et al., 2019.  
526 Coupling Krebs cycle metabolites to signalling in immunity and cancer. *Nature Metabolism* 1(1):  
527 16–33, Doi: 10.1038/s42255-018-0014-7.
  - 528 [3] Campbell, S.L., Wellen, K.E., 2018. Metabolic Signaling to the Nucleus in Cancer. *Molecular Cell*  
529 71(3): 398–408, Doi: 10.1016/j.molcel.2018.07.015.
  - 530 [4] Schvartzman, J.M., Thompson, C.B., Finley, L.W.S., 2018. Metabolic regulation of chromatin  
531 modifications and gene expression. *The Journal of Cell Biology* 217(7): 2247–59, Doi:  
532 10.1083/jcb.201803061.
  - 533 [5] Wang, Y., Guo, Y.R., Liu, K., Yin, Z., Liu, R., Xia, Y., et al., 2017. KAT2A coupled with the  $\alpha$ -KGDH  
534 complex acts as a histone H3 succinyltransferase. *Nature*, Doi: 10.1038/nature25003.
  - 535 [6] Chokkathukalam, A., Kim, D.-H., Barrett, M.P., Breitling, R., Creek, D.J., 2014. Stable isotope-  
536 labeling studies in metabolomics: new insights into structure and dynamics of metabolic  
537 networks. *Bioanalysis* 6(4): 511–24, Doi: 10.4155/bio.13.348.
  - 538 [7] Mehrmohamadi, M., Liu, X., Shestov, A.A., Locasale, J.W., 2014. Characterization of the usage of  
539 the serine metabolic network in human cancer. *Cell Reports* 9(4): 1507–19, Doi:  
540 10.1016/j.celrep.2014.10.026.
  - 541 [8] Alves, T.C., Pongratz, R.L., Zhao, X., Yarborough, O., Sereda, S., Shirihai, O., et al., 2015.  
542 Integrated, Step-Wise, Mass-Isotopomeric Flux Analysis of the TCA Cycle. *Cell Metabolism* 22(5):  
543 936–47, Doi: 10.1016/j.cmet.2015.08.021.
  - 544 [9] Antoniewicz, M.R., 2018. A guide to  $^{13}\text{C}$  metabolic flux analysis for the cancer biologist.  
545 *Experimental & Molecular Medicine* 50(4): 19, Doi: 10.1038/s12276-018-0060-y.
  - 546 [10] Vacanti, N.M., Divakaruni, A.S., Green, C.R., Parker, S.J., Henry, R.R., Ciaraldi, T.P., et al., 2014.

- 547 Regulation of substrate utilization by the mitochondrial pyruvate carrier. *Molecular Cell* 56(3):  
548 425–35, Doi: 10.1016/j.molcel.2014.09.024.
- 549 [11] Gravel, S.-P., Andrzejewski, S., Avizonis, D., St-Pierre, J., 2014. Stable isotope tracer analysis in  
550 isolated mitochondria from mammalian systems. *Metabolites* 4(2): 166–83, Doi:  
551 10.3390/metabo4020166.
- 552 [12] Wellen, K.E., Snyder, N.W., 2019. Should we consider subcellular compartmentalization of  
553 metabolites, and if so, how do we measure them? *Current Opinion in Clinical Nutrition and*  
554 *Metabolic Care* 22(5): 347–54, Doi: 10.1097/MCO.0000000000000580.
- 555 [13] Basu, S.S., Blair, I.A., 2012. SILEC: a protocol for generating and using isotopically labeled  
556 coenzyme A mass spectrometry standards. *Nature Protocols* 7(1): 1–12, Doi:  
557 10.1038/nprot.2011.421.
- 558 [14] James, A.M., Smith, C.L., Smith, A.C., Robinson, A.J., Hoogewijs, K., Murphy, M.P., 2018. The  
559 Causes and Consequences of Nonenzymatic Protein Acylation. *Trends in Biochemical Sciences*  
560 43(11): 921–32, Doi: 10.1016/j.tibs.2018.07.002.
- 561 [15] Frey, A.J., Feldman, D.R., Trefely, S., Worth, A.J., Basu, S.S., Snyder, N.W., 2016. LC-  
562 quadrupole/Orbitrap high-resolution mass spectrometry enables stable isotope-resolved  
563 simultaneous quantification and (13)C-isotopic labeling of acyl-coenzyme A thioesters. *Analytical*  
564 *and Bioanalytical Chemistry* 408(13): 3651–8, Doi: 10.1007/s00216-016-9448-5.
- 565 [16] Zhao, S., Torres, A., Henry, R.A., Trefely, S., Wallace, M., Lee, J. V., et al., 2016. ATP-Citrate Lyase  
566 Controls a Glucose-to-Acetate Metabolic Switch. *Cell Reports* 17(4): 1037–52, Doi:  
567 10.1016/j.celrep.2016.09.069.
- 568 [17] Schug, Z.T.T., Peck, B., Jones, D.T.T., Zhang, Q., Grosskurth, S., Alam, I.S.S., et al., 2015. Acetyl-  
569 CoA synthetase 2 promotes acetate utilization and maintains cancer cell growth under metabolic  
570 stress. *Cancer Cell* 27(1): 57–71, Doi: 10.1016/j.ccell.2014.12.002.
- 571 [18] Bulusu, V., Tumanov, S., Michalopoulou, E., van den Broek, N.J., MacKay, G., Nixon, C., et al.,  
572 2017. Acetate Recapturing by Nuclear Acetyl-CoA Synthetase 2 Prevents Loss of Histone  
573 Acetylation during Oxygen and Serum Limitation. *Cell Reports* 18(3): 647–58, Doi:  
574 10.1016/j.celrep.2016.12.055.
- 575 [19] Chen, W.W., Freinkman, E., Wang, T., Birsoy, K., Sabatini, D.M., 2016. Absolute Quantification of  
576 Matrix Metabolites Reveals the Dynamics of Mitochondrial Metabolism. *Cell* 166(5): 1324-  
577 1337.e11, Doi: 10.1016/j.cell.2016.07.040.
- 578 [20] Bayraktar, E.C., Baudrier, L., Özerdem, C., Lewis, C.A., Chan, S.H., Kunchok, T., et al., 2019. MITO-  
579 Tag Mice enable rapid isolation and multimodal profiling of mitochondria from specific cell types  
580 in vivo. *Proceedings of the National Academy of Sciences* 116(1): 303–12, Doi:  
581 10.1073/pnas.1816656115.
- 582 [21] Abu-Remaileh, M., Wyant, G.A., Kim, C., Laqtom, N.N., Abbasi, M., Chan, S.H., et al., 2017.  
583 Lysosomal metabolomics reveals V-ATPase- and mTOR-dependent regulation of amino acid efflux  
584 from lysosomes. *Science (New York, N.Y.)* 358(6364): 807–13, Doi: 10.1126/science.aan6298.
- 585 [22] Wyant, G.A., Abu-Remaileh, M., Wolfson, R.L., Chen, W.W., Freinkman, E., Danai, L. V., et al.,  
586 2017. mTORC1 Activator SLC38A9 Is Required to Efflux Essential Amino Acids from Lysosomes  
587 and Use Protein as a Nutrient. *Cell* 171(3): 642–654.e12, Doi: 10.1016/j.cell.2017.09.046.
- 588 [23] Lee, W.D., Mukha, D., Aizenshtein, E., Shlomi, T., 2019. Spatial-fluxomics provides a subcellular-  
589 compartmentalized view of reductive glutamine metabolism in cancer cells. *Nature*  
590 *Communications* 10(1): 1351, Doi: 10.1038/s41467-019-09352-1.
- 591 [24] Nishida, Y., Rardin, M.J., Carrico, C., He, W., Sahu, A.K., Gut, P., et al., 2015. SIRT5 Regulates both  
592 Cytosolic and Mitochondrial Protein Malonylation with Glycolysis as a Major Target. *Molecular*  
593 *Cell* 59(2): 321–32, Doi: 10.1016/j.molcel.2015.05.022.
- 594 [25] Kurmi, K., Hitosugi, S., Wiese, E.K., Boakye-Agyeman, F., Gonsalves, W.I., Lou, Z., et al., 2018.

- 595 Carnitine Palmitoyltransferase 1A Has a Lysine Succinyltransferase Activity. *Cell Reports* 22(6):  
596 1365–73, Doi: 10.1016/j.celrep.2018.01.030.
- 597 [26] Basu, S.S., Mesaros, C., Gelhaus, S.L., Blair, I.A., 2011. Stable Isotope Labeling by Essential  
598 Nutrients in Cell Culture for Preparation of Labeled Coenzyme A and Its Thioesters. *Analytical*  
599 *Chemistry* 83(4): 1363–9, Doi: 10.1021/ac1027353.
- 600 [27] Trefely, S., Ashwell, P., Snyder, N.W., 2016. FluxFix: automatic isotopologue normalization for  
601 metabolic tracer analysis. *BMC Bioinformatics* 17(1): 485, Doi: 10.1186/s12859-016-1360-7.
- 602 [28] Guo, L., Worth, A.J., Mesaros, C., Snyder, N.W., Glickson, J.D., Blair, I.A., 2016.  
603 Diisopropylethylamine/hexafluoroisopropanol-mediated ion-pairing ultra-high-performance  
604 liquid chromatography/mass spectrometry for phosphate and carboxylate metabolite analysis:  
605 utility for studying cellular metabolism. *Rapid Communications in Mass Spectrometry* 30(16):  
606 1835–45, Doi: 10.1002/rcm.7667.  
607

A

## Dual labeling

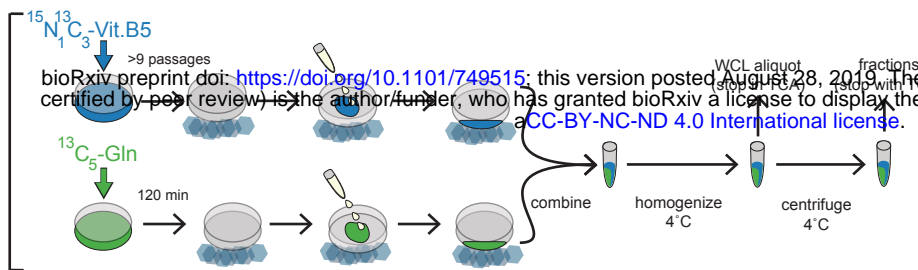

## no SILEC control

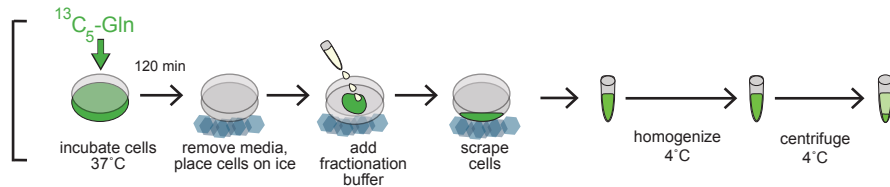

B

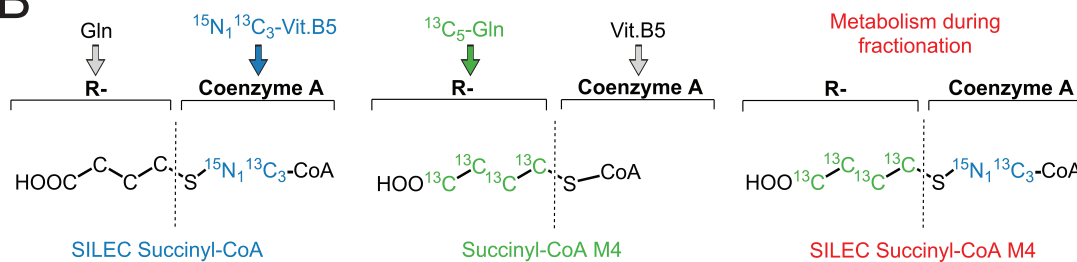

C

## Succinyl-CoA

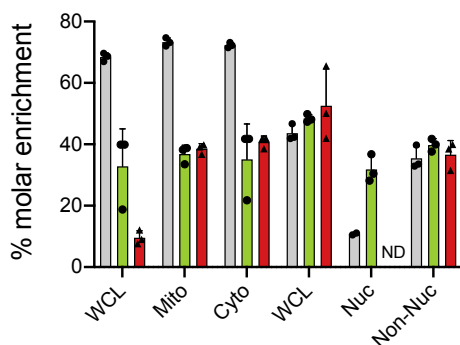

Fractionation method: Mito/cyto Nuclear  
U13C-Gln pre-incubation (120 min)

Grey bar: Succinyl-CoA M4 (no SILEC control)  
Green bar: Succinyl-CoA M4  
Red bar: SILEC Succinyl-CoA M4

D

## Acetyl-CoA

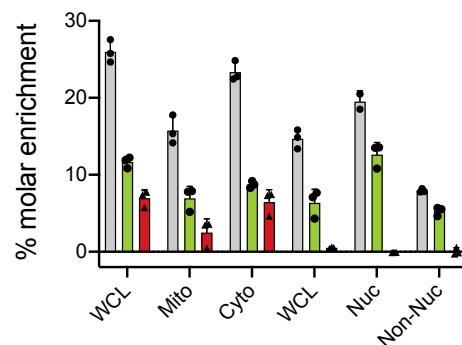

Fractionation method: Mito/cyto Nuclear  
U13C-Gln pre-incubation (120 min)

Grey bar: Acetyl-CoA M2 (no SILEC control)  
Green bar: Acetyl-CoA M2  
Red bar: SILEC Acetyl-CoA M2

## Figure 1: Dual labeling strategy reveals metabolism during fractionation

**A)** Schematic overview of dual labeling scheme. HepG2 cells were labeled either by culturing in  $^{15}\text{N}_1^{13}\text{C}_3$ -vitamin B5 for >9 passages or incubation in DMEM containing  $^{15}\text{N}_2^{13}\text{C}_5$ -glutamine (2 mM) and unlabeled glucose (5 mM) without serum for 120 min. Differently labeled cells were combined after scraping and subjected to sub-cellular fractionation with whole cell lysate (WCL) aliquot removed after homogenization. **B)**  $^{15}\text{N}_1^{13}\text{C}_3$ -vitamin B5 is incorporated into the Coenzyme A backbone of acyl-CoA molecules (e.g. SILEC succinyl-CoA) whilst  $^{15}\text{N}_2^{13}\text{C}_5$ -glutamine labels acyl (R-group) carbons (e.g. Succinyl-CoA M4). Generation of doubly labeled molecules (e.g. SILEC succinyl-CoA M4) after the labeled cells are combined indicates post-harvest metabolism during fractionation. **C, D)** Total acyl labeling was calculated for control cells that were not combined with SILEC cells as a % of the total non-SILEC acyl-CoA pool (grey bars). For dual labeling samples, the molar enrichment of acyl labelling in molecules without SILEC CoA labeling (green bars) or molecules with SILEC CoA labeling (red bars) was calculated by normalization to control samples without acyl carbon labeling i.e.  $^{15}\text{N}_2^{13}\text{C}_5$ -glutamine was replaced with unlabeled glutamine. n=3 distinct replicate samples, error bars indicate standard deviation.

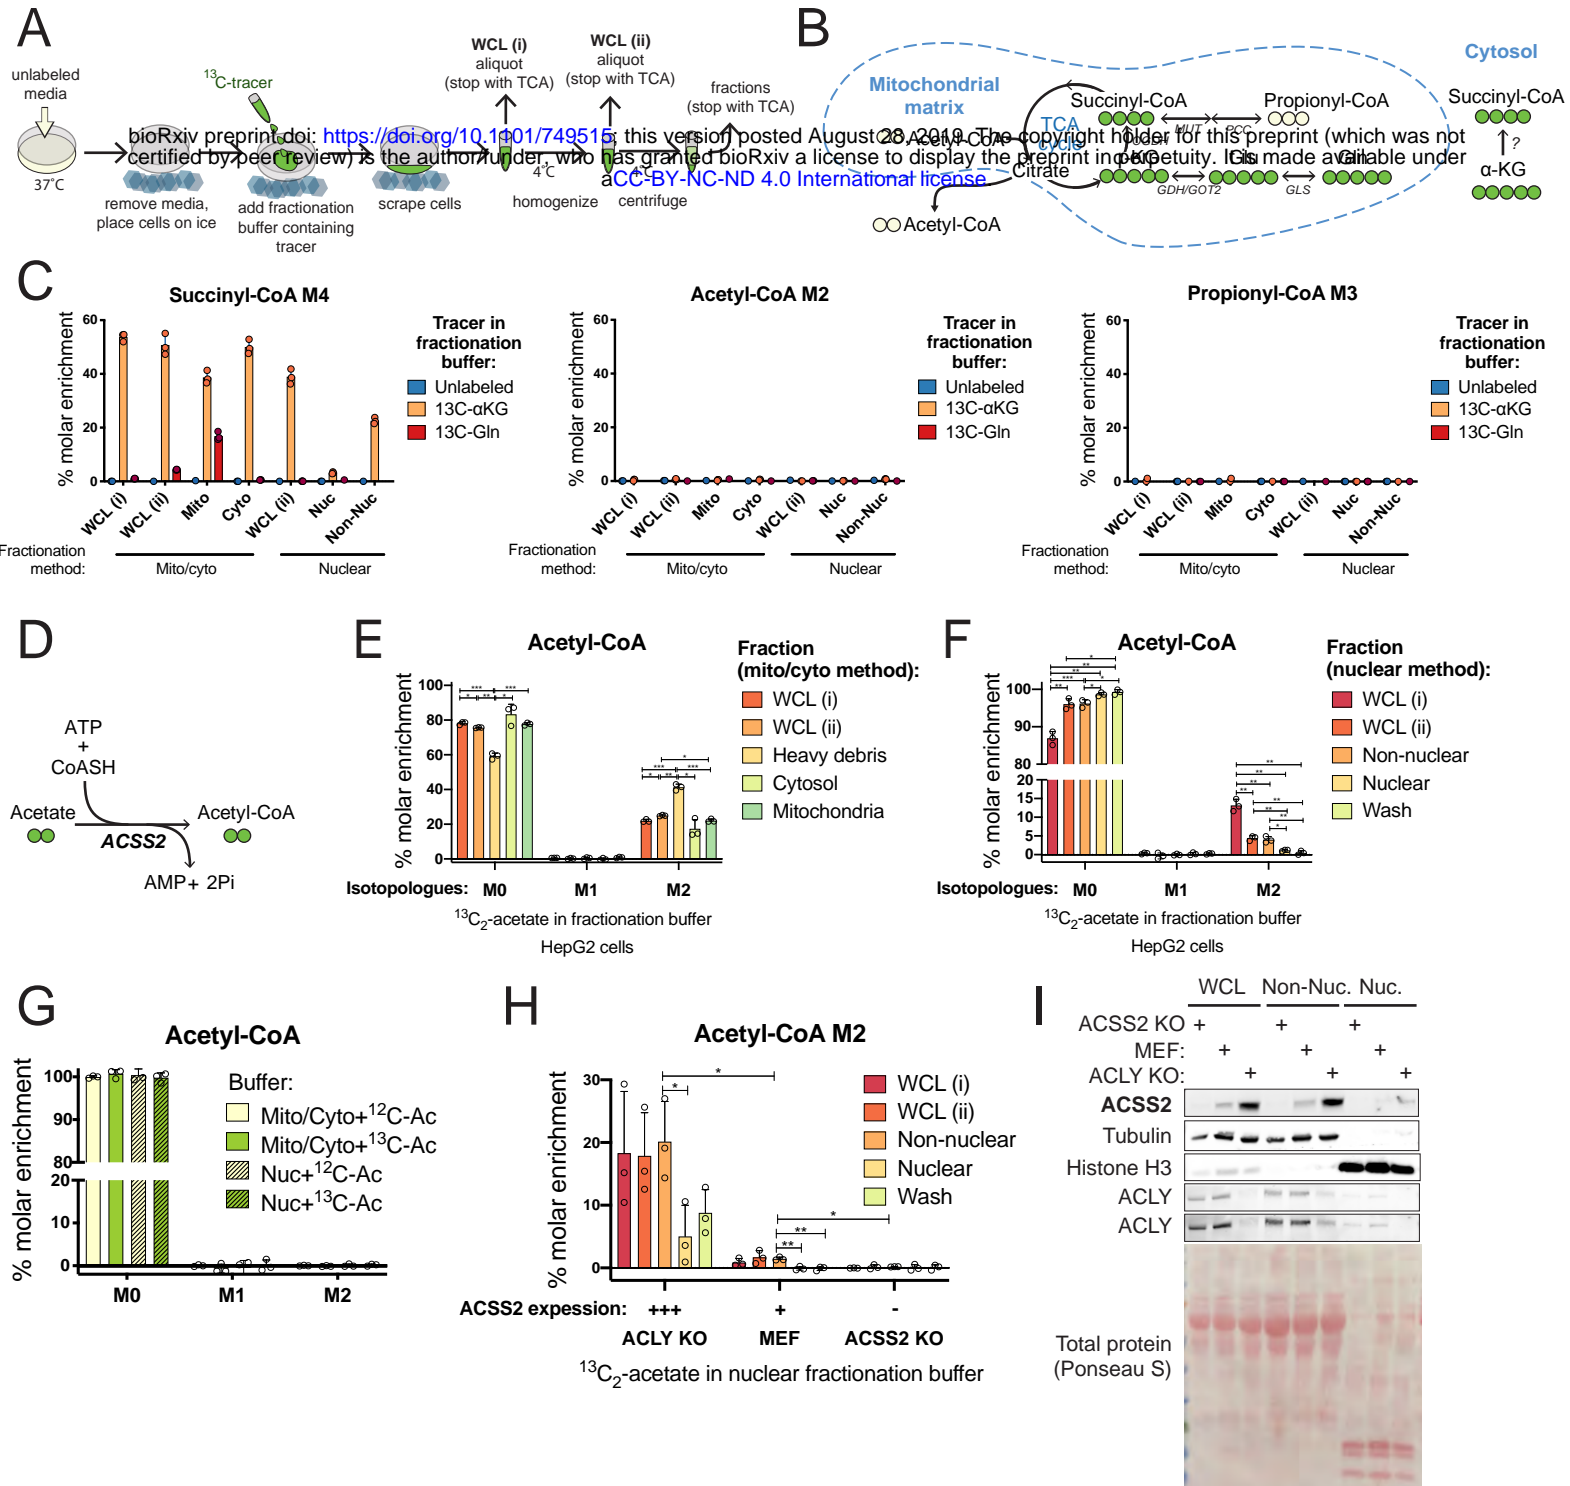

**Figure 2: Substrate use during fractionation follows defined metabolic pathways**

**A)** Schematic overview of labeling approach to test for post-harvest metabolism. Cells were cultured in unlabeled media and <sup>13</sup>C-labeled substrate was introduced in the fractionation buffer before fractionation processing and quenching of fractionations in trichloroacetic acid (TCA). **B)** Incorporation of <sup>15</sup>N<sub>2</sub><sup>13</sup>C<sub>5</sub>-glutamine or <sup>13</sup>C<sub>5</sub>-α-ketoglutarate into the mitochondrial TCA cycle results in labelling of 4 acyl carbons of succinyl-CoA. The enzymatic pathway for incorporation of <sup>13</sup>C<sub>5</sub>-α-ketoglutarate into succinyl-CoA M4 in the cytosol is not defined. **C)** Hepatocellular carcinoma (HepG2) cells were harvested in fractionation buffer containing either 0.5 mM <sup>15</sup>N<sub>2</sub><sup>13</sup>C<sub>5</sub>-glutamine or 0.5 mM <sup>13</sup>C<sub>5</sub>-α-ketoglutarate and % molar enrichment of acyl labelling was calculated by normalization to unlabeled control samples **D)** Acyl-CoA synthetase short-chain family member 2 (ACS2) catalyzes the conversion of acetate to acetyl-CoA. HepG2 cells were harvested in fractionation buffer containing 0.1 mM <sup>13</sup>C<sub>2</sub>-acetate and % molar enrichment of acetyl-CoA isotopologues was calculated by normalization to control samples with unlabeled acetate in the fractionation buffer for mito/cyto **E)** and nuclear **F)** fractionation protocols. **G)** Isotopologue enrichment was analyzed in de-proteinated HepG2 cell extracts resuspended in fractionation buffer for mito/cyto or nuclear protocols containing 0.1 mM <sup>13</sup>C<sub>2</sub>-acetate or unlabeled acetate and incubated on ice for 1 h before extraction. **H)** ACLY KO, control and ACS2 KO MEF cells were harvested in fractionation buffer containing 0.1 mM <sup>13</sup>C<sub>2</sub>-acetate and acetyl-CoA M2 enrichment calculated by normalization to control samples harvested in fractionation buffer containing 0.1 mM unlabeled acetate. **I)** Western blot analysis comparing ACS2 expression levels in ACLY KO, control and ACS2 KO MEF cells with equal protein loading. Tubulin and histone H3 serve as loading controls and fraction-specific markers for non-nuclear and nuclear fractions, respectively. The fractionation buffers for both these methods are hypotonic sugar solutions, with the most notable difference being the presence of dilute detergent (0.1% NP-40) in the nuclear fractionation buffer. This detergent destroys the mitochondrial membrane such that the non-nuclear fraction is expected to contain soluble mitochondrial contents. Representative experiments are shown with bars representing the mean of n=3 distinct replicate samples (individual symbols) and error bars indicating standard deviation. For comparison between two groups, datasets were analyzed by two-tailed student's t-test with statistical significance defined as p < 0.05 (\*), p < 0.01 (\*\*), p < 0.001 (\*\*\*)

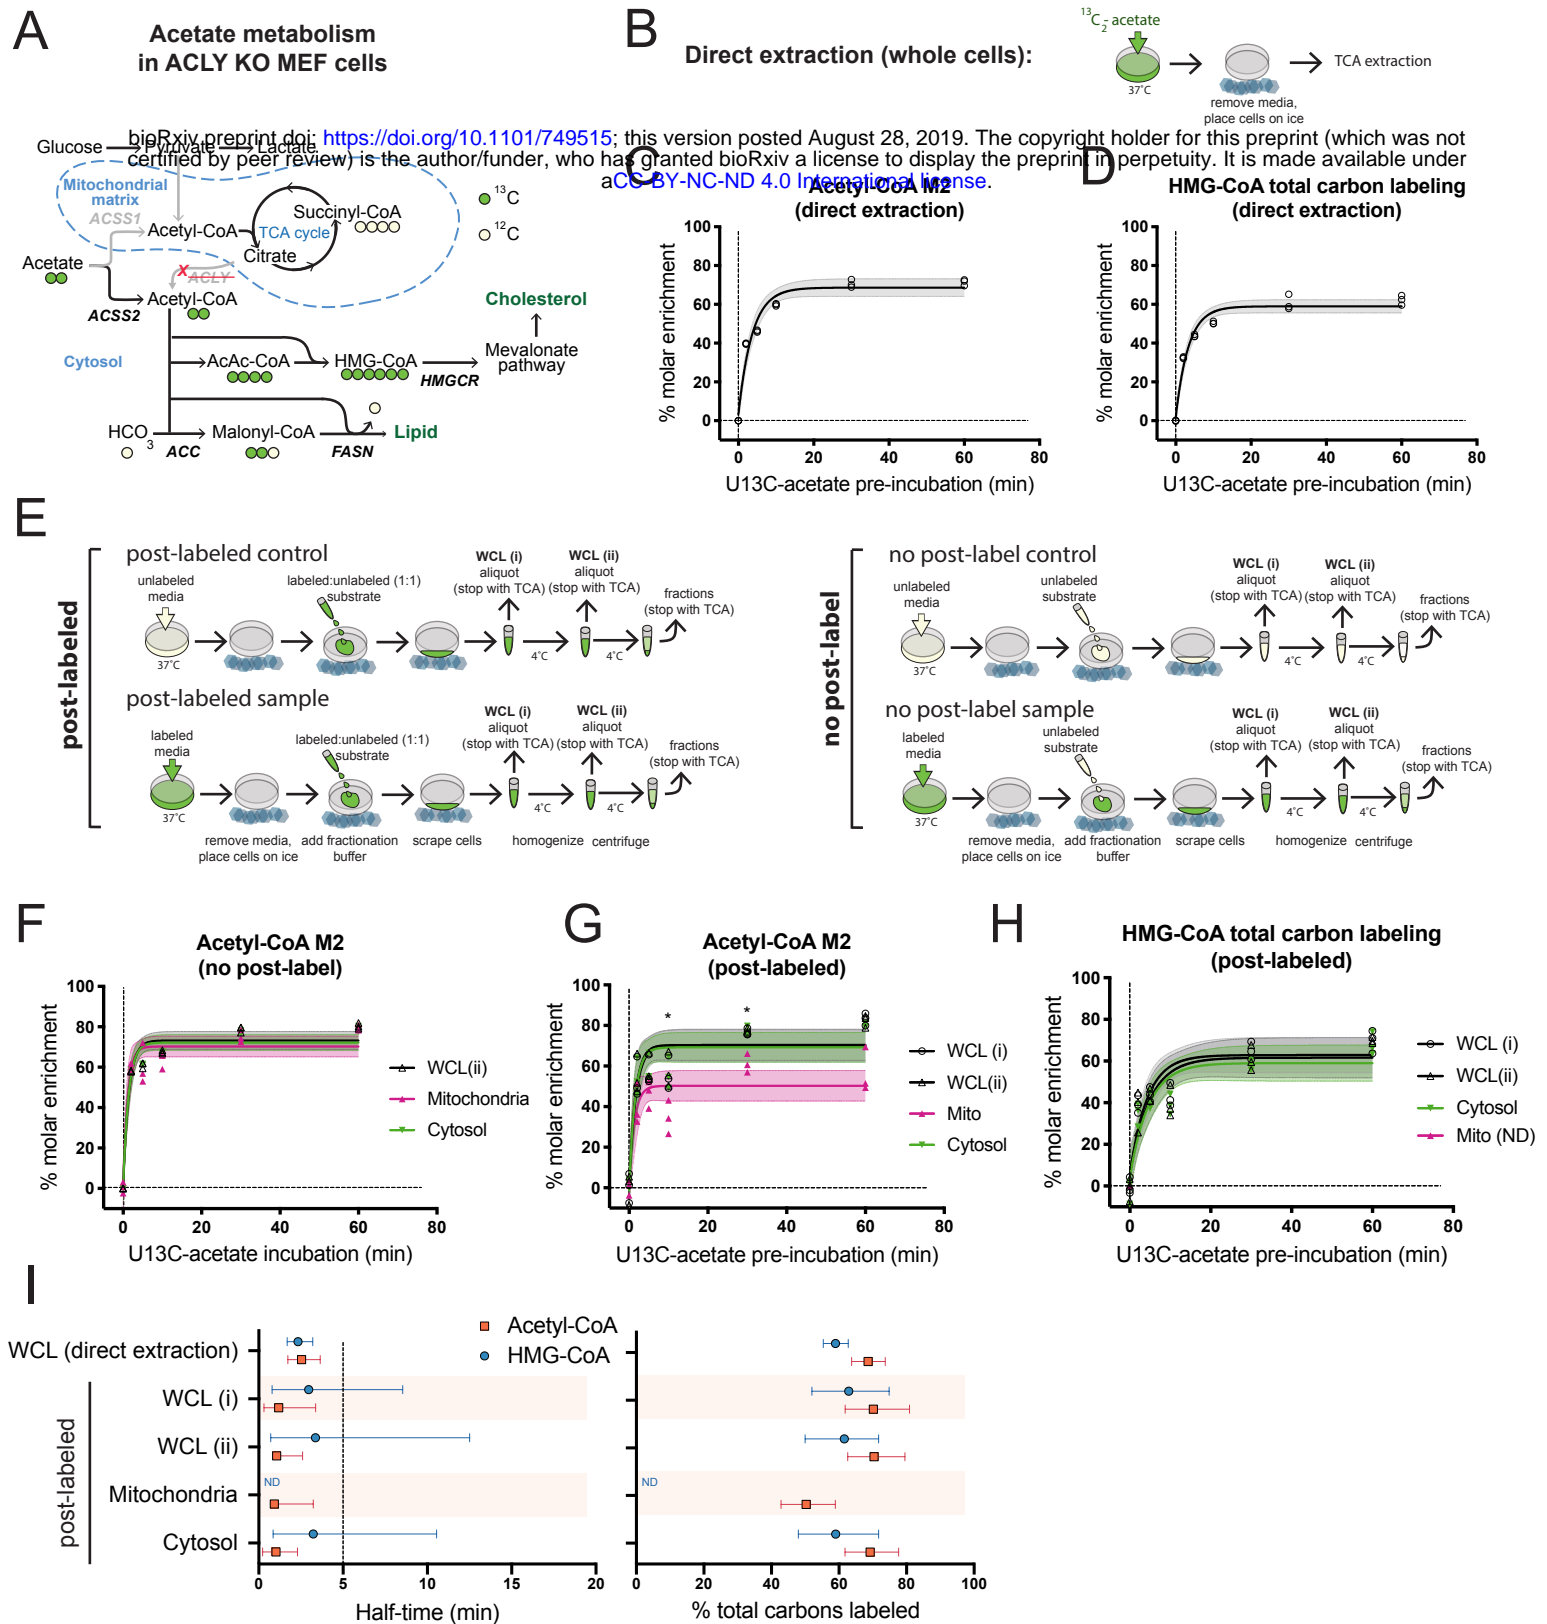

**Figure 3: Post-labeling correction resolves mitochondrial and cytosolic acetyl-CoA metabolism**

ACLY KO MEF cells were pre-labeled by incubation with 0.1 mM  $^{13}\text{C}_2$ -acetate over a time-course. **A**) Acetate is preferentially used for cytosolic acetyl-CoA generation in ACLY KO MEFs. **B**) In direct extraction, whole cells were immediately quenched in trichloroacetic acid (TCA). **C**) Acetyl-CoA M2 enrichment after direct extraction. **D**) 3-hydroxymethylglutaryl-CoA (HMG-CoA) total acyl carbon labeling, indicating % enrichment of all 6 acyl carbon atoms after direct extraction. **E**) Schematic comparison of post-labeled and no post-label approach. Post-labeling accounts for artifactual metabolism during processing by addition of a supraphysiological concentration of partially labeled tracer to cells that were pre-labeled with tracer as well as controls that were not pre-labeled. No tracer is added upon cell harvest in the no post-label approach. **F**) Representative data from time-course for enrichment of acetyl-CoA M2 into whole cell lysate (WCL), mitochondria and cytosol after sub-cellular fractionation with no post-labeling. Enrichment was calculated by normalization to unlabeled controls (time=0). **G**) Representative data from time-course for enrichment of acetyl-CoA M2 and **H**) HMG-CoA in whole cell lysate (WCL), mitochondria and cytosol after sub-cellular fractionation with post-labeling by inclusion of 5 mM each of  $^{13}\text{C}_2$ -acetate and unlabeled acetate in the fractionation buffer. Enrichment was calculated by normalization to post-labeled controls (time=0). **I**) Comparison of direct extraction from whole cells and post-label normalization of sub-cellular fractions at steady-state. Representative experiments with  $n=3$  distinct replicate samples (individual symbols) are shown and error bars indicating 95% confidence bands. For **C, D, F, H**, shading indicates 95% confidence bands and symbols represent individual replicate values. For **F** and **G**, statistical significance was determined for comparison between mitochondrial and cytosolic data for each time point by two-tailed student's t-test analysis with significance defined as  $p < 0.05$  (\*). ND = not determined.





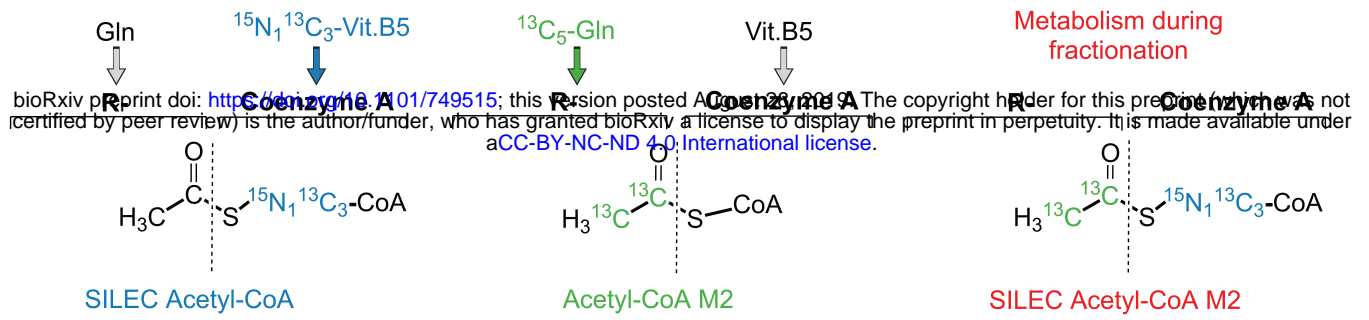

### Supplemental Figure 1: Dual labelling strategy reveals metabolism during fractionation

$^{15}\text{N}_1\text{ } ^{13}\text{C}_3$ -vitamin B5 is incorporated into the Coenzyme A backbone of acyl-CoA molecules (e.g. SILEC acetyl-CoA) whilst  $^{15}\text{N}_2\text{ } ^{13}\text{C}_5$ -glutamine labels acyl (R-group) carbons (e.g. acetyl-CoA M4). Generation of doubly labelled molecules (e.g. SILEC succinyl-CoA M4) after the labelled cells are combined indicates post-harvest metabolism during fractionation.



**A**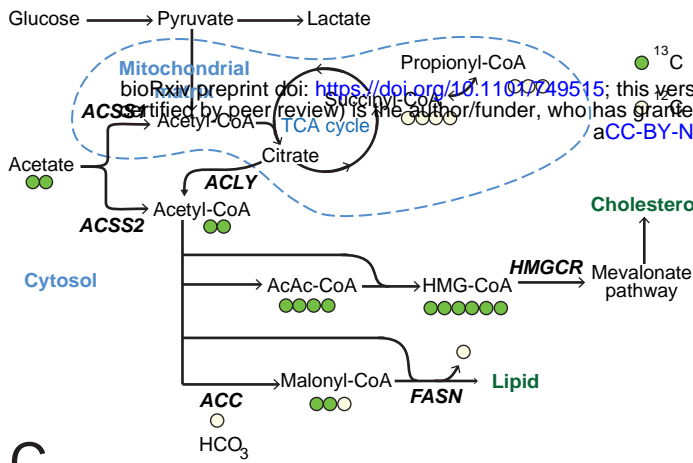**B****HepG2 protein distribution**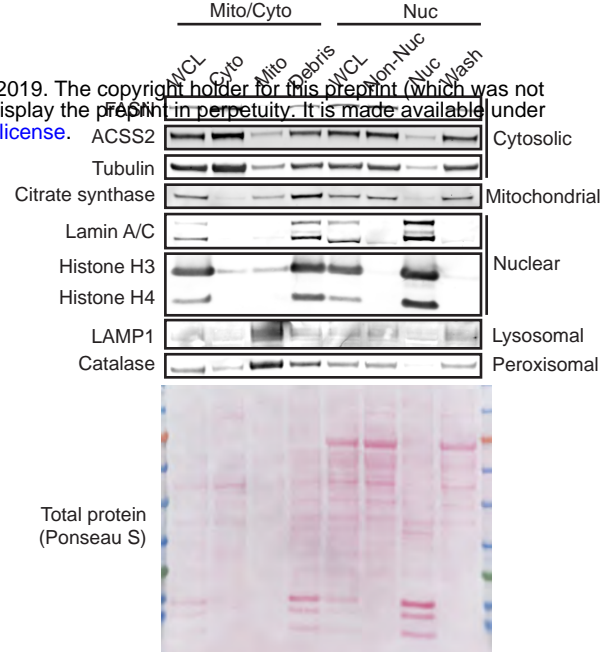**C**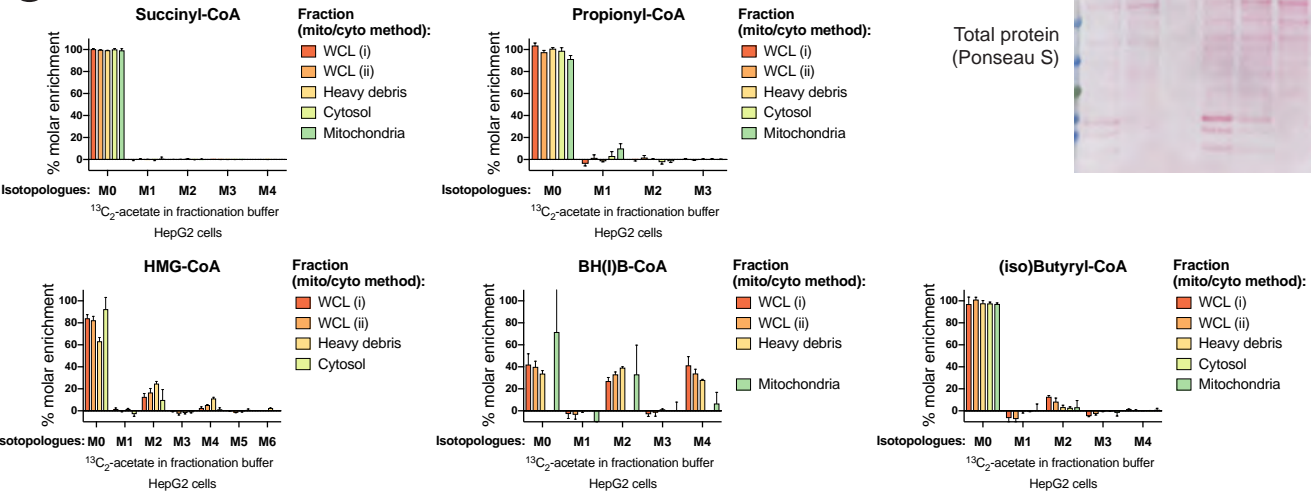**D**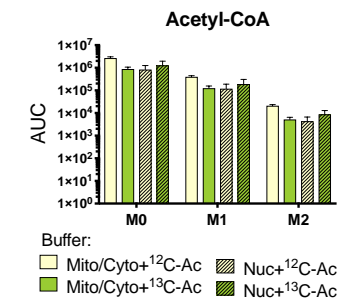**E**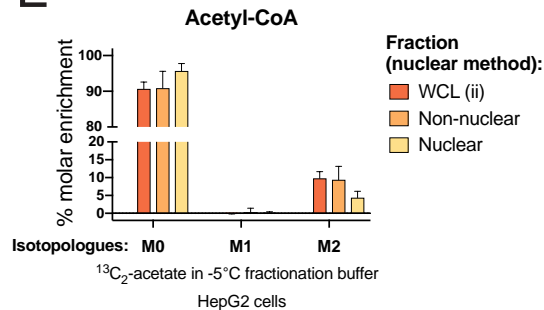**F**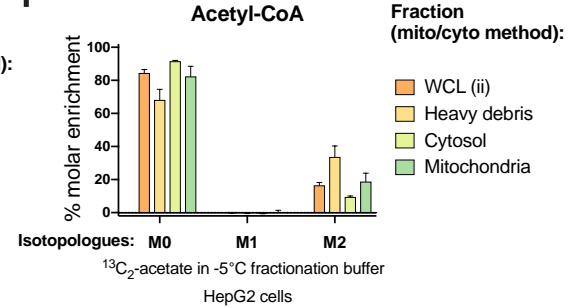**Supplemental Figure 2: Substrate use during fractionation follows defined metabolic pathways**

**A)** Schematic representation of acetate metabolism in HepG2 cells. **B)** Western blotting was used to confirm appropriate protein distribution in sub-cellular fractions from HepG2 cells with equal protein loading. FASN (fatty acid synthase), ACSS2 (Acyl-CoA Synthetase Short Chain Family Member 2), LAMP1 (lysosomal associated membrane protein 1), WCL (whole cell lysate), Cyto (cytosol), mito (mitochondria). **C)** Isotopologue enrichment of short chain acyl-CoA species following addition of 0.1 mM  $^{13}\text{C}_2$ -acetate to the fractionation buffer during mito/cyto fractionation procedure in HepG2 cells. 3-hydroxymethylglutaryl-CoA (HMG-CoA),  $\beta$ -hydroxy(iso)butyryl-CoA (BH(I)B-CoA). Isobutyryl-CoA and butyryl-CoA, and  $\beta$ -hydroxyisobutyryl-CoA and  $\beta$ -hydroxybutyryl-CoA were not differentiated by mass spectrometry analysis. **D)** Raw area under the curve (AUC) data from isotopologue peaks of acetyl-CoA in de-proteinated HepG2 cell extracts resuspended in fractionation buffer for mito/cyto or nuclear protocols containing 0.1 mM  $^{13}\text{C}_2$ -acetate or unlabeled acetate and incubated on ice for 1 h before extraction. **E-F)** HepG2 cells were harvested at  $-5^\circ\text{C}$  in fractionation buffer containing 0.1 mM  $^{13}\text{C}_2$ -acetate and % molar enrichment of acetyl-CoA isotopologues was calculated by normalization to control samples with unlabeled acetate in the fractionation buffer for mito/cyto and nuclear fractionation protocols. Mean of  $n=3$  replicates from representative experiments is shown with error bars indicating standard deviation.

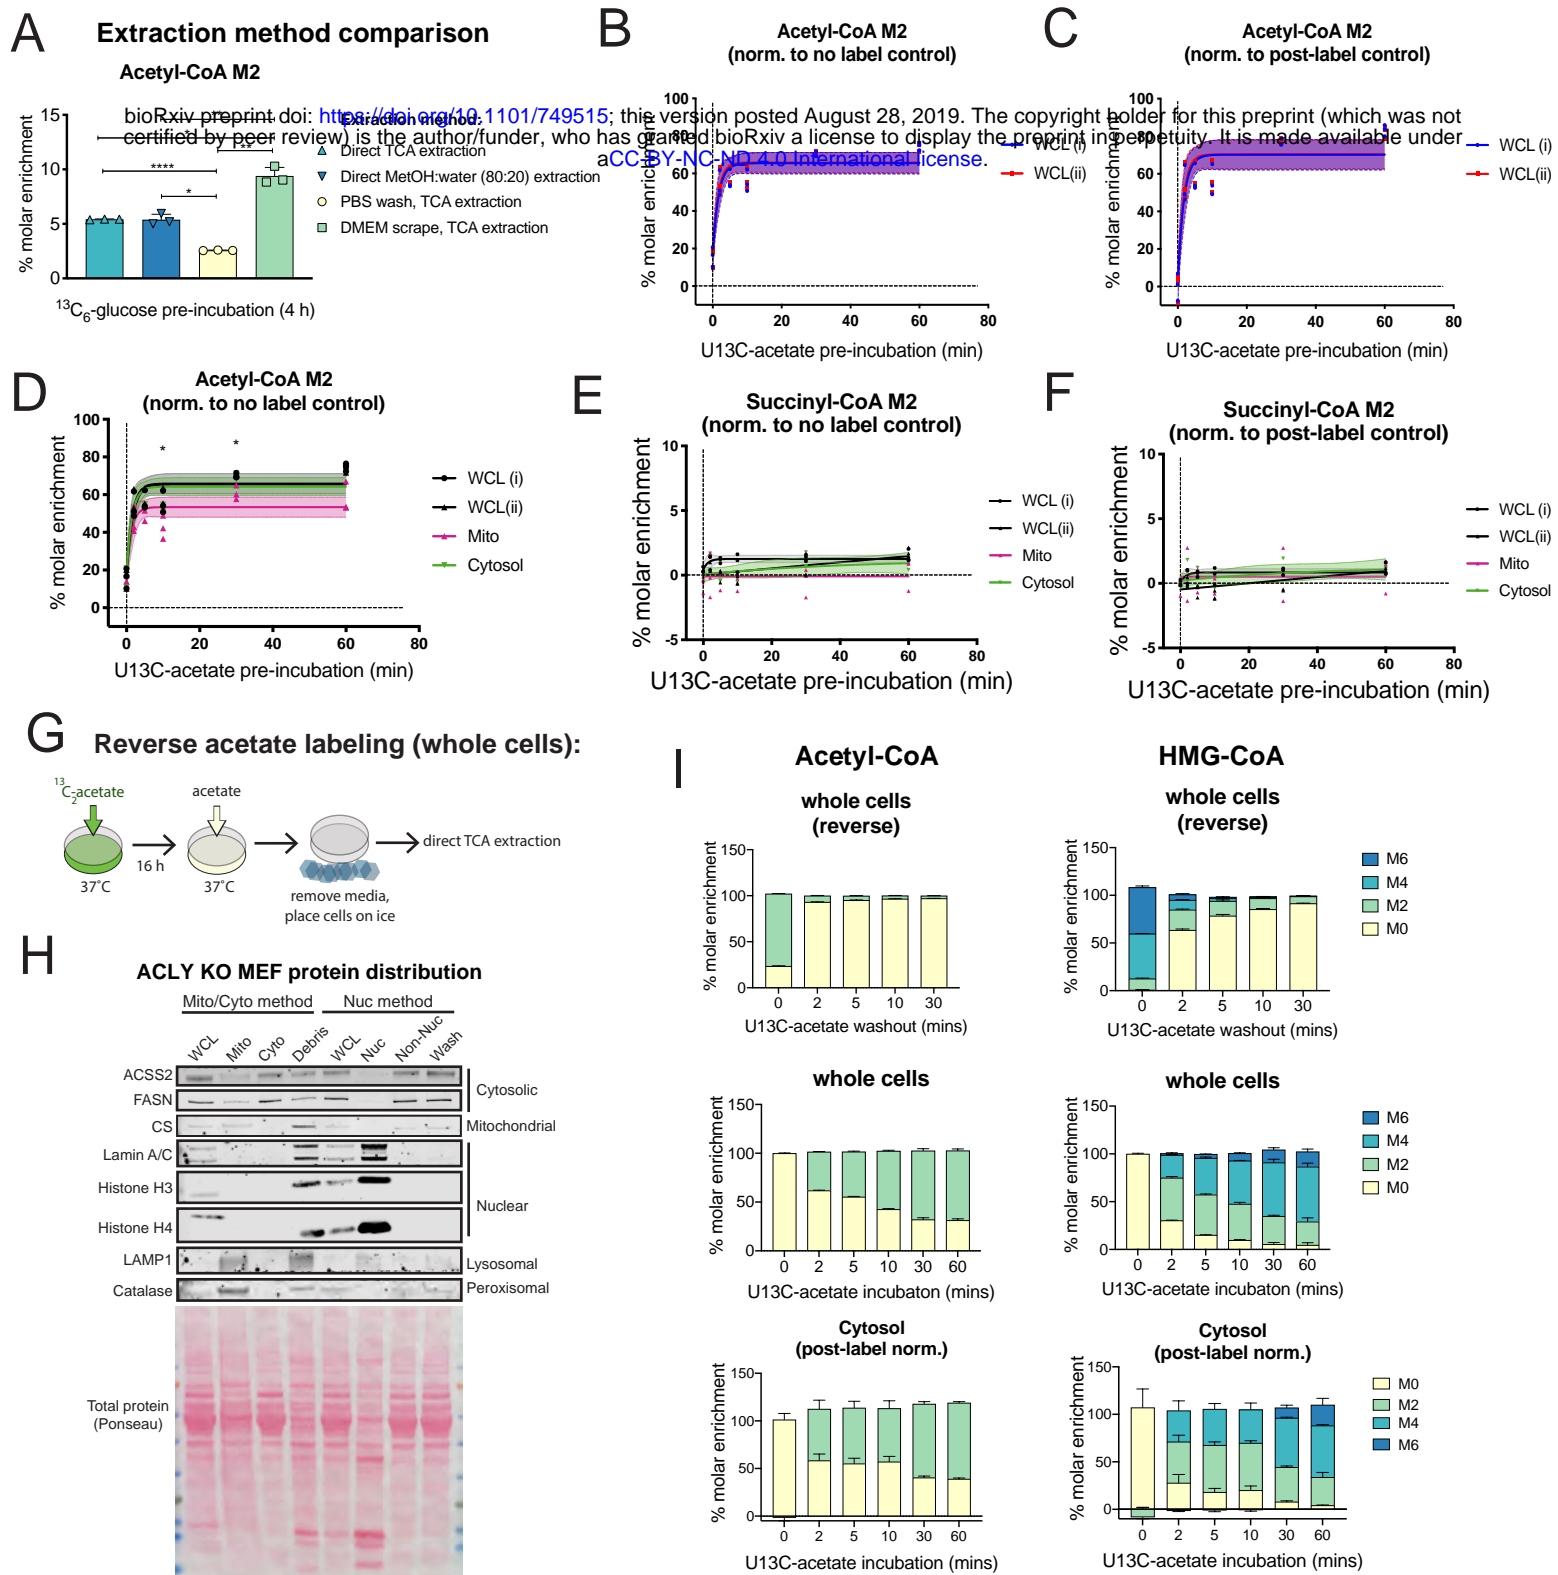

### Supplemental Figure 3: Post-labeling correction resolves mitochondrial and cytosolic acetyl-CoA metabolism

**A)** Comparison of incorporation of glucose into acetyl-CoA in ACLY KO MEFs pre-incubated in 5 mM <sup>13</sup>C<sub>6</sub>-glucose in the absence of acetate for 4 h before harvest of whole cells using 4 different techniques. **B-H)** ACLY KO MEF cells were pre-labeled by incubation with 0.1 mM <sup>13</sup>C<sub>2</sub>-acetate over a time-course. **B)** Comparison of absolute labeling in WCL i and WCL ii post-labeled samples by normalization to no label control. **D)** Comparison of corrected WCL i and WCL ii post-labeled data when normalized to post-label control. **D-E)** Absolute isotopologue enrichment of mito/cyto fractionation post-labeled data when normalized to no label control for acetyl-CoA M2 and succinyl-CoA M2. **F)** Succinyl-CoA M2 post-labeled data when normalized to post-label control. **G)** Schematic representation of reverse labeling scheme with 16 h pre-incubation in 0.1 mM <sup>13</sup>C<sub>2</sub>-acetate switched to unlabeled acetate over a time-course before direct extraction of whole cells in trichloroacetic acid (TCA). **H)** Protein distribution analysis by Western blot in sub-cellular fractions from ACLY KO MEFs with equal protein loading. CS (citrate synthase), ACSS2 (Acyl-CoA Synthetase Short Chain Family Member 2). **I)** Comparison of acetyl-CoA and HMG-CoA isotopologue enrichment in whole cells with direct extraction (reverse and forward labeling) and cytosol isolated by sub-cellular fractionation with post-labeling normalization with the addition 5 mM each of <sup>13</sup>C<sub>2</sub>-acetate and unlabeled acetate in the fractionation buffer (forward labeling). A representative experiment for each paradigm is shown with n=3 distinct replicates for each experiment. Error bars represent standard deviation and individual replicates are not displayed for the sake of graphical clarity. **A-F)** Data from representative experiments is shown. Shading indicates 95% confidence bands and symbols represent individual replicate values (n=3-4). For comparison between two groups, datasets were analyzed by student's t-test with statistical significance defined as p < 0.05 (\*), p < 0.01 (\*\*), p < 0.001 (\*\*\*), p < 0.0001 (\*\*\*\*).

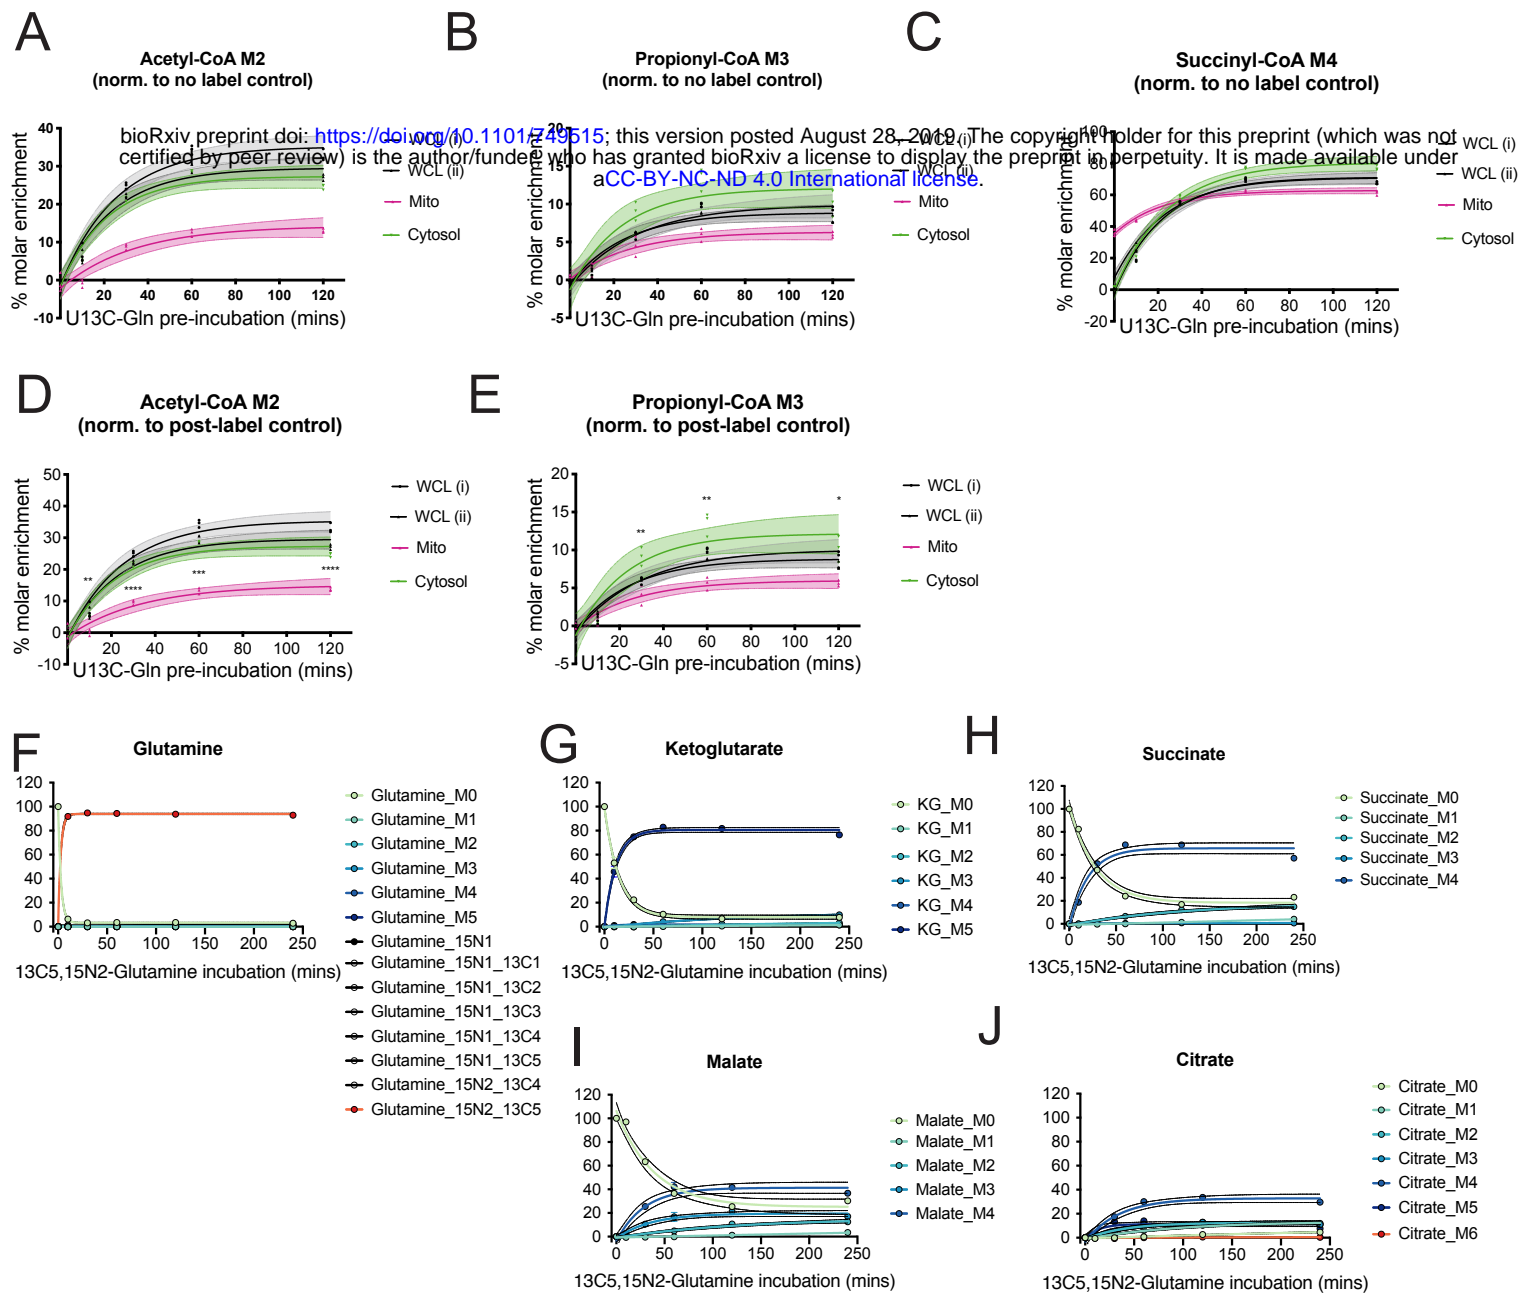

**Supplemental Figure 4: Kinetics of glutamine metabolism in the mitochondria are transformed by post-label correction**  
HepG2 cells were pre-labeled over a time-course with 2 mM  $^{15}\text{N}_2$  $^{13}\text{C}_5$ -glutamine. Absolute isotopologue enrichment of mito/cyto fractionation post-labeled data when normalized to no label control for acetyl-CoA M2 (**A**), propionyl-CoA M3 (**B**) and succinyl-CoA M4 (**C**). Acetyl-CoA M2 (**D**) and propionyl-CoA M3 (**E**) post-labeled data when corrected by normalization to post-labeled control. **F-J**) Isotopologue analysis of tricarboxylic acid (TCA) cycle intermediates after direct extraction from whole cells. Data from representative experiments is shown. Shading indicates 95% confidence bands and symbols represent individual replicate values ( $n=3$ ). For comparison between two groups, datasets were analyzed by student's t-test with statistical significance defined as  $p < 0.05$  (\*),  $p < 0.01$  (\*\*),  $p < 0.001$  (\*\*\*),  $p < 0.0001$  (\*\*\*\*).
