# Supplementary material for: Subcellular metabolic pathway kinetics are revealed by correcting for artifactual post harvest metabolism
Source: bioRxiv or medRxiv preprint supplement (doi:10.1101/749515), 2019-08-28
Supplement: Supplementary file [file media-1.pdf]

**Table 1: Acyl-CoA Mass List**

| Isotopologue          | Precursor Formula [M]       | Precursor Ion [M+H] <sup>+</sup> | Product Ion [M+H-507] <sup>+</sup> |
|-----------------------|-----------------------------|----------------------------------|------------------------------------|
| Succinyl-CoA          | C25H40N7O19P3S              | 868.1385                         | 361.1428                           |
| Succinyl-CoA-M1       | [13]C1C24H40N7O19P3S        | 869.1419                         | 362.1461                           |
| Succinyl-CoA-M2       | [13]C2C23H40N7O19P3S        | 870.1452                         | 363.1495                           |
| Succinyl-CoA-M3       | [13]C3C22H40N7O19P3S        | 871.1486                         | 364.1528                           |
| Succinyl-CoA-M4       | [13]C4C21H40N7O19P3S        | 872.1520                         | 365.1562                           |
| Succinyl-CoA-M5       | [13]C5C20H40N7O19P3S        | 873.1553                         | 366.1596                           |
| Succinyl-CoA-M6       | [13]C6C19H40N7O19P3S        | 874.1587                         | 367.1629                           |
| Succinyl-CoA-M7       | [13]C7C18H40N7O19P3S        | 875.1620                         | 368.1663                           |
| Acetyl-CoA            | C23H38N7O17P3S              | 810.1331                         | 303.1373                           |
| Acetyl-CoA-M1         | [13]C1C22H38N7O17P3S        | 811.1364                         | 304.1407                           |
| Acetyl-CoA-M2         | [13]C2C21H38N7O17P3S        | 812.1398                         | 305.1440                           |
| Acetyl-CoA-M3         | [13]C3C20H38N7O17P3S        | 813.1431                         | 306.1474                           |
| Acetyl-CoA-M4         | [13]C4C19H38N7O17P3S        | 814.1465                         | 307.1507                           |
| Acetyl-CoA-M5         | [13]C5C18H38N7O17P3S        | 815.1498                         | 308.1541                           |
| Propionyl-CoA         | C24H40N7O17P3S              | 824.1487                         | 317.1530                           |
| Propionyl-CoA-M1      | [13]C1C23H40N7O17P3S        | 825.1521                         | 318.1563                           |
| Propionyl-CoA-M2      | [13]C2C22H40N7O17P3S        | 826.1554                         | 319.1488                           |
| Propionyl-CoA-M3      | [13]C3C20H40N7O17P3S        | 827.1588                         | 320.1521                           |
| Propionyl-CoA-M4      | [13]C4C19H40N7O17P3S        | 828.1621                         | 321.1555                           |
| Propionyl-CoA-M5      | [13]C5C18H40N7O17P3S        | 829.1655                         | 322.1564                           |
| 3HMG-CoA*             | C27H44N7O20P3S              | 912.1647                         | 405.1690                           |
| 3HMG-CoA-M1           | [13]C1C26H44N7O20P3S        | 913.1681                         | 406.1724                           |
| 3HMG-CoA-M2           | [13]C2C25H44N7O20P3S        | 914.1715                         | 407.1757                           |
| 3HMG-CoA-M3           | [13]C3C24H44N7O20P3S        | 915.1748                         | 408.1791                           |
| 3HMG-CoA-M4           | [13]C4C23H44N7O20P3S        | 916.1782                         | 409.1824                           |
| 3HMG-CoA-M5           | [13]C5C22H44N7O20P3S        | 917.1815                         | 410.1858                           |
| 3HMG-CoA-M6           | [13]C6C21H44N7O20P3S        | 918.1849                         | 411.1891                           |
| 3HMG-CoA-M7           | [13]C7C20H44N7O20P3S        | 919.1882                         | 412.1925                           |
| 3HMG-CoA-M8           | [13]C8C19H44N7O20P3S        | 920.1916                         | 413.1958                           |
| 3HMG-CoA-M9           | [13]C9C18H44N7O20P3S        | 921.1949                         | 414.1992                           |
| 3H(I)B-CoA**          | C25H42N7O18P3S              | 854.1593                         | 347.1635                           |
| 3H(I)B -CoA-M1        | [13]C1C24H42N7O18P3S        | 855.1626                         | 348.1669                           |
| 3H(I)B -CoA-M2        | [13]C2C23H42N7O18P3S        | 856.1660                         | 349.1702                           |
| 3H(I)B -CoA-M3        | [13]C3C22H42N7O18P3S        | 857.1693                         | 350.1736                           |
| 3H(I)B -CoA-M4        | [13]C4C21H42N7O18P3S        | 858.1727                         | 351.1769                           |
| 3H(I)B -CoA-M5        | [13]C5C20H42N7O18P3S        | 859.1760                         | 352.1803                           |
| 3H(I)B -CoA-M6        | [13]C6C19H42N7O18P3S        | 860.1794                         | 353.1836                           |
| 3H(I)B -CoA-M7        | [13]C7C18H42N7O18P3S        | 861.1827                         | 354.1870                           |
| [Iso]Butyryl-CoA      | C25H42N7O17P3S              | 838.1644                         | 331.1686                           |
| [Iso]Butyryl-CoA-M1   | [13]C1C24H42N7O17P3S        | 839.1677                         | 332.1720                           |
| [Iso]Butyryl-CoA-M2   | [13]C2C23H42N7O17P3S        | 840.1711                         | 333.1753                           |
| [Iso]Butyryl-CoA-M3   | [13]C3C22H42N7O17P3S        | 841.1744                         | 334.1787                           |
| [Iso]Butyryl-CoA-M4   | [13]C4C21H42N7O17P3S        | 842.1778                         | 335.1820                           |
| [Iso]Butyryl-CoA-M5   | [13]C5C20H42N7O17P3S        | 843.1811                         | 336.1854                           |
| [Iso]Butyryl-CoA-M6   | [13]C6C19H42N7O17P3S        | 844.1845                         | 337.1887                           |
| [Iso]Butyryl-CoA-M7   | [13]C7C18H42N7O17P3S        | 845.1878                         | 338.1921                           |
| Acetyl-CoA SILEC      | [13]C3C20H38[15]N1N6O17P3S  | 814.1401                         | 307.1444                           |
| Acetyl-CoA SILEC-M1   | [13]C4C19H38[15]N1N6O17P3S  | 815.1435                         | 308.1478                           |
| Acetyl-CoA SILEC-M2   | [13]C5C18H38[15]N1N6O17P3S  | 816.1469                         | 309.1511                           |
| Acetyl-CoA SILEC-M3   | [13]C6C17H38[15]N1N6O17P3S  | 817.1502                         | 310.1545                           |
| Acetyl-CoA SILEC-M4   | [13]C7C16H38[15]N1N6O17P3S  | 818.1536                         | 311.1578                           |
| Acetyl-CoA SILEC-M5   | [13]C8C15H38[15]N1N6O17P3S  | 819.1569                         | 312.1612                           |
| Succinyl-CoA SILEC    | [13]C3C22H40[15]N1N6O19P3S  | 872.1456                         | 365.1499                           |
| Succinyl-CoA SILEC-M1 | [13]C4C21H40[15]N1N6O19P3S  | 873.1490                         | 366.1533                           |
| Succinyl-CoA SILEC-M2 | [13]C5C20H40[15]N1N6O19P3S  | 874.1523                         | 367.1566                           |
| Succinyl-CoA SILEC-M3 | [13]C6C19H40[15]N1N6O19P3S  | 875.1557                         | 368.1560                           |
| Succinyl-CoA SILEC-M4 | [13]C7C18H40[15]N1N6O19P3S  | 876.1591                         | 369.1633                           |
| Succinyl-CoA SILEC-M5 | [13]C8C17H40[15]N1N6O19P3S  | 877.1624                         | 370.1666                           |
| Succinyl-CoA SILEC-M6 | [13]C9C16H40[15]N1N6O19P3S  | 878.1658                         | 371.1700                           |
| Succinyl-CoA SILEC-M7 | [13]C10C15H40[15]N1N6O19P3S | 879.1691                         | 372.1734                           |

\*HMG-CoA (3-hydroxymethylglutaryl-CoA), \*\*3H(I)B-CoA (3-hydroxybutyrate-CoA/3-hydroxyisobutyrate-CoA)

**Table 2: TCA Cycle Mass List**

| Isotopologue                    | Formula [M]           | Precursor Ion [M-H]- |
|---------------------------------|-----------------------|----------------------|
| Glutamine                       | C5H10N2O3             | 145.0608             |
| [13]C1-glutamine                | [13]C1C4H10N2O3       | 146.0641             |
| [13]C2-glutamine                | [13]C2C3H10N2O3       | 147.0675             |
| [13]C3-glutamine                | [13]C3C2H10N2O3       | 148.0708             |
| [13]C4-glutamine                | [13]C4C1H10N2O3       | 149.0742             |
| [13]C5-glutamine                | [13]C5H10N2O3         | 150.0775             |
| [15]N1-glutamine                | C5H10[15]N1N1O3       | 146.0589             |
| [13]C1[15]N1-glutamine          | [13]C1C4H10[15]N1N1O3 | 147.0623             |
| [13]C2[15]N1-glutamine          | [13]C2C3H10[15]N1N1O3 | 148.0656             |
| [13]C3[15]N1-glutamine          | [13]C3C2H10[15]N1N1O3 | 149.0690             |
| [13]C4[15]N1-glutamine          | [13]C4C1H10[15]N1N1O3 | 150.0723             |
| [13]C5[15]N1-glutamine          | [13]C5H10[15]N1N1O3   | 151.0757             |
| [15]N2-glutamine                | C5H10[15]N2O3         | 147.0559             |
| [13]C1[15]N2-glutamine          | [13]C1C4H10[15]N2O3   | 148.0593             |
| [13]C2[15]N2-glutamine          | [13]C2C3H10[15]N2O3   | 149.0626             |
| [13]C3[15]N2-glutamine          | [13]C3C2H10[15]N2O3   | 150.0660             |
| [13]C4[15]N2-glutamine          | [13]C4C1H10[15]N2O3   | 151.0694             |
| [13]C5[15]N2-glutamine          | [13]C5H10[15]N2O3     | 152.0727             |
| $\alpha$ -Ketoglutarate         | C5H6O5                | 145.0142             |
| [13]C1- $\alpha$ -Ketoglutarate | [13]C1C4H6O5          | 146.0176             |
| [13]C2- $\alpha$ -Ketoglutarate | [13]C2C3H6O5          | 147.0185             |
| [13]C3- $\alpha$ -Ketoglutarate | [13]C3C2H6O5          | 148.0218             |
| [13]C4- $\alpha$ -Ketoglutarate | [13]C4C1H6O5          | 149.0227             |
| [13]C5- $\alpha$ -Ketoglutarate | [13]C5H6O5            | 150.0261             |
| Succinate                       | C4H5O4                | 117.0193             |
| [13]C1-succinate                | [13]C1C3H5O4          | 118.0227             |
| [13]C2-succinate                | [13]C2C2H5O4          | 119.0236             |
| [13]C3-succinate                | [13]C3C1H5O4          | 120.0269             |
| [13]C4-succinate                | [13]C4H5O4            | 121.0278             |
| Malate                          | C4H6O5                | 133.0131             |
| [13]C1-malate                   | [13]C1C3H6O5          | 134.0165             |
| [13]C2-malate                   | [13]C2C2H6O5          | 135.0199             |
| [13]C3-malate                   | [13]C3C1H6O5          | 136.0232             |
| [13]C4-malate                   | [13]C4H6O5            | 137.0266             |
| Citrate                         | C6H8O7                | 191.0197             |
| [13]C1-citrate                  | [13]C1C5H8O7          | 192.0231             |
| [13]C2-citrate                  | [13]C2C4H8O7          | 193.0240             |
| [13]C3-citrate                  | [13]C3C3H8O7          | 194.0273             |
| [13]C4-citrate                  | [13]C4C2H8O7          | 195.0331             |
| [13]C5-citrate                  | [13]C5C1H8O7          | 196.0365             |
| [13]C6-citrate                  | [13]C6H8O7            | 197.0374             |
